# Supplementary material for: Exploring the Functional Disorder and Corresponding Key Transcription Factors in Intraductal Papillary Mucinous Neoplasms Progression
Source: Int J Genomics. 2015 Sep 3;2015:197603. doi: 10.1155/2015/197603 (PMC4573622; doi:10.1155/2015/197603)
Supplement: Supplementary file 1 — Supplementary Tables. functional enrichment analysis for 8 clusters of DEGs. DAVID was used to evaluate the biological processes and pathways related to these 8 clusters of DEGs. Meanwhile, we estimated the relationship between the GO terms (biological process of the GO database) and the KEGG pathways. The threshold of enrichment score for enriched clusters was set as 1. [file 197603.f1.xlsx]

## Sheet: tables Introduction
Table C1-C8. results of functional enrichment analysis for 8 DEGs clusters: C1-C8 sheet.

## Sheet: C1
function clusters	Annotation Cluster 1	Enrichment Score: 8.758148337832074
	Category	Term	Count	%	PValue	Genes	List Total	Pop Hits	Pop Total	Fold Enrichment	Bonferroni	Benjamini	FDR
blood vessel development	GOTERM_BP_FAT	GO:0001944~vasculature development	41	4.49561	1.51335e-10	EMCN, CAV1, ACVRL1, NRP1, LEPR, ANPEP, ENPEP, GJA4, MMP2, CXCL12, CDH5, GJC1, CITED2, TCF21, APOE, HEY2, ROBO4, QKI, SOX17, THBS1, EGF, PPAP2B, ANGPTL4, RECK, COL18A1, SELP, FLT1, TBX3, PDPN, MMP19, APOLD1, COL15A1, SLIT2, THY1, VEGFC, BGN, NTRK2, NOTCH4, ECSCR, ZFPM2, ENG	698	251	13528	3.16584	4.56124e-07	1.52041e-07	2.72647e-07
	GOTERM_BP_FAT	GO:0001568~blood vessel development	39	4.27632	9.77322e-10	EMCN, CAV1, ACVRL1, NRP1, LEPR, ANPEP, ENPEP, GJA4, MMP2, CXCL12, CDH5, GJC1, CITED2, APOE, HEY2, ROBO4, QKI, SOX17, THBS1, EGF, PPAP2B, ANGPTL4, RECK, COL18A1, SELP, FLT1, TBX3, MMP19, APOLD1, COL15A1, SLIT2, THY1, VEGFC, BGN, NTRK2, NOTCH4, ECSCR, ZFPM2, ENG	698	245	13528	3.08515	2.94564e-06	5.8913e-07	1.76075e-06
	GOTERM_BP_FAT	GO:0048514~blood vessel morphogenesis	33	3.61842	3.59399e-08	EMCN, CAV1, ACVRL1, NRP1, LEPR, ANPEP, ENPEP, CXCL12, GJC1, CITED2, APOE, HEY2, ROBO4, QKI, SOX17, THBS1, EGF, ANGPTL4, COL18A1, SELP, FLT1, MMP19, APOLD1, COL15A1, SLIT2, THY1, VEGFC, BGN, NTRK2, NOTCH4, ECSCR, ZFPM2, ENG	698	211	13528	3.03117	0.000108317	1.80537e-05	6.47496e-05
	Annotation Cluster 2	Enrichment Score: 5.548142580968369
	Category	Term	Count	%	PValue	Genes	List Total	Pop Hits	Pop Total	Fold Enrichment	Bonferroni	Benjamini	FDR
regulation of cell migration and locomotion	GOTERM_BP_FAT	GO:0030334~regulation of cell migration	26	2.85088	1.79296e-06	DLC1, ACVRL1, GREM1, CXCL12, ADA, CITED2, APOE, INS, TEK, APOH, ROBO4, TIE1, THBS1, COL18A1, SELP, IL6, FLT1, PDPN, SPHK1, IGF1, IGF2, NEXN, THY1, LAMA2, VEGFC, PDGFRB, CHRD	698	169	13528	2.98171	0.0053894	0.000771699	0.00323015
	GOTERM_BP_FAT	GO:0051270~regulation of cell motion	28	3.07018	2.1151e-06	DLC1, NRP1, ACVRL1, PKHD1, GREM1, CXCL12, ADA, CITED2, INS, APOE, TEK, APOH, ROBO4, TIE1, THBS1, COL18A1, SELP, IL6, FLT1, PDPN, SPHK1, IGF1, IGF2, NEXN, THY1, LAMA2, VEGFC, PDGFRB, CHRD	698	193	13528	2.81176	0.00635465	0.000796549	0.00381052
	GOTERM_BP_FAT	GO:0040012~regulation of locomotion	27	2.96053	5.97958e-06	DLC1, ACVRL1, GREM1, CXCL12, ADA, CITED2, APOE, INS, TEK, APOH, ROBO4, TIE1, THBS1, COL18A1, SELP, IL6, FLT1, PDPN, SPHK1, IGF1, IGF2, NEXN, SLIT2, THY1, LAMA2, VEGFC, PDGFRB, CHRD	698	192	13528	2.72547	0.0178611	0.00138539	0.0107723
	Annotation Cluster 3	Enrichment Score: 3.8615593742382677
	Category	Term	Count	%	PValue	Genes	List Total	Pop Hits	Pop Total	Fold Enrichment	Bonferroni	Benjamini	FDR
cell migration and locomotion	GOTERM_BP_FAT	GO:0016477~cell migration	32	3.50877	3.6777e-05	NRTN, ACVRL1, NRP1, CCL2, NDN, CUZD1, ZEB2, ITGB2, ENPEP, PRKG1, CXCL12, NRCAM, PLA2G1B, LHX6, THBS1, PPAP2B, DCLK1, NR2F1, THBS4, NKX2-3, SELP, IL6, FLT1, VAV3, ARID5B, SLIT2, VEGFC, TNS1, PDGFRB, RELN, ENG, MYH10	698	276	13528	2.24708	0.104925	0.00502587	0.066237
	GOTERM_BP_FAT	GO:0051674~localization of cell	32	3.50877	0.000265995	NRTN, ACVRL1, NRP1, CCL2, NDN, CUZD1, ZEB2, ITGB2, ENPEP, PRKG1, CXCL12, NRCAM, PLA2G1B, LHX6, THBS1, PPAP2B, DCLK1, NR2F1, THBS4, NKX2-3, SELP, IL6, FLT1, VAV3, ARID5B, SLIT2, VEGFC, TNS1, PDGFRB, RELN, ENG, MYH10	698	307	13528	2.02018	0.551486	0.0208793	0.478135
	GOTERM_BP_FAT	GO:0048870~cell motility	32	3.50877	0.000265995	NRTN, ACVRL1, NRP1, CCL2, NDN, CUZD1, ZEB2, ITGB2, ENPEP, PRKG1, CXCL12, NRCAM, PLA2G1B, LHX6, THBS1, PPAP2B, DCLK1, NR2F1, THBS4, NKX2-3, SELP, IL6, FLT1, VAV3, ARID5B, SLIT2, VEGFC, TNS1, PDGFRB, RELN, ENG, MYH10	698	307	13528	2.02018	0.551486	0.0208793	0.478135
	Annotation Cluster 4	Enrichment Score: 3.779990845783967
	Category	Term	Count	%	PValue	Genes	List Total	Pop Hits	Pop Total	Fold Enrichment	Bonferroni	Benjamini	FDR
neuron development differentiation	GOTERM_BP_FAT	GO:0031175~neuron projection development	31	3.39912	2.20516e-05	FGFR1, NRTN, NRP1, NDN, PKHD1, UCHL1, PRKG1, CXCL12, NRCAM, EFHD1, DCLK1, IL6, NRXN3, MAP1B, LIFR, NFASC, NRXN1, GAS1, GAS7, SLIT2, SLIT3, AMIGO1, MAP2, PHGDH, RELN, CNTN4, NGFR, GAP43, KALRN, MYH10, FEZ1	698	256	13528	2.34693	0.0643038	0.00349201	0.0397209
	GOTERM_BP_FAT	GO:0048666~neuron development	35	3.83772	0.000156238	FGFR1, NRTN, NRP1, NDN, PKHD1, UCHL1, PRKG1, CXCL12, NRCAM, EFHD1, SLC1A3, LHX6, DCLK1, IL6, NRXN3, MAP1B, NFASC, LIFR, NRXN1, GAS1, GAS7, SLIT2, SLIT3, THY1, AMIGO1, NTRK2, MAP2, PHGDH, RELN, CNTN4, NGFR, GAP43, KALRN, MYH10, FEZ1	698	339	13528	2.001	0.375584	0.0137557	0.281106
	GOTERM_BP_FAT	GO:0030182~neuron differentiation	41	4.49561	0.000312118	FGFR1, NRTN, NRP1, NDN, PKHD1, UCHL1, SOX5, PRKG1, CXCL12, NRCAM, GATA2, EFHD1, SLC1A3, LHX6, DCLK1, IL6, BHLHE22, NRXN3, STMN2, MAP1B, NFASC, LIFR, NRXN1, GAS1, GAS7, SLIT2, THY1, SLIT3, AMIGO1, PRKCQ, NTRK2, MAP2, PHGDH, RELN, CNTN4, ID3, NGFR, GAP43, KALRN, MYH10, FEZ1	698	438	13528	1.81421	0.609712	0.0238362	0.560824
	GOTERM_BP_FAT	GO:0030030~cell projection organization	35	3.83772	0.000705487	FGFR1, NRTN, DNAH9, NRP1, NDN, PKHD1, UCHL1, LPAR3, PRKG1, CXCL12, NRCAM, EFHD1, DCLK1, THBS4, IL6, VAV3, NRXN3, MAP1B, NFASC, LIFR, NRXN1, GAS1, GAS7, SLIT2, SLIT3, AMIGO1, MAP2, PHGDH, RELN, CNTN4, NGFR, GAP43, KALRN, MYH10, FEZ1	698	368	13528	1.84331	0.880816	0.037936	1.26341
	Annotation Cluster 5	Enrichment Score: 3.231808267584465
	Category	Term	Count	%	PValue	Genes	List Total	Pop Hits	Pop Total	Fold Enrichment	Bonferroni	Benjamini	FDR
negative regulation of cell migration and locomotion	GOTERM_BP_FAT	GO:0051271~negative regulation of cell motion	12	1.31579	0.000332477	DLC1, ACVRL1, PKHD1, APOE, APOH, TIE1, GREM1, THBS1, CHRD, ADA, CITED2, THY1	698	63	13528	3.69164	0.632948	0.024745	0.597302
	GOTERM_BP_FAT	GO:0030336~negative regulation of cell migration	11	1.20614	0.000591233	DLC1, ACVRL1, APOE, APOH, TIE1, GREM1, THBS1, CHRD, ADA, CITED2, THY1	698	57	13528	3.74021	0.831784	0.0343473	1.05983
	GOTERM_BP_FAT	GO:0040013~negative regulation of locomotion	11	1.20614	0.00102578	DLC1, ACVRL1, APOE, APOH, TIE1, GREM1, THBS1, CHRD, ADA, CITED2, THY1	698	61	13528	3.49495	0.954647	0.0486676	1.83201
	Annotation Cluster 6	Enrichment Score: 2.842488278149832
	Category	Term	Count	%	PValue	Genes	List Total	Pop Hits	Pop Total	Fold Enrichment	Bonferroni	Benjamini	FDR
regulation of phosphate metabolic process	GOTERM_BP_FAT	GO:0019220~regulation of phosphate metabolic process	42	4.60526	0.00123748	DLC1, ADCY1, CAV1, ENPP1, PKHD1, C5, TGFB3, FPR1, LPAR3, ZEB2, ITGB2, PRKAR2B, SPRY1, DIRAS3, INS, APOE, PLA2G1B, PDGFC, CERK, EGF, THBS1, PPP1R14A, GHR, IL6, VAV3, FLT1, SPHK1, PKIG, IGF1, IGF2, RCAN1, HGF, ADIPOQ, THY1, SH3BP5, VEGFC, CCND2, FABP4, PDGFRB, RELN, ENG, GAP43, CBS	698	485	13528	1.67836	0.976057	0.0557994	2.20614
	GOTERM_BP_FAT	GO:0051174~regulation of phosphorus metabolic process	42	4.60526	0.00123748	DLC1, ADCY1, CAV1, ENPP1, PKHD1, C5, TGFB3, FPR1, LPAR3, ZEB2, ITGB2, PRKAR2B, SPRY1, DIRAS3, INS, APOE, PLA2G1B, PDGFC, CERK, EGF, THBS1, PPP1R14A, GHR, IL6, VAV3, FLT1, SPHK1, PKIG, IGF1, IGF2, RCAN1, HGF, ADIPOQ, THY1, SH3BP5, VEGFC, CCND2, FABP4, PDGFRB, RELN, ENG, GAP43, CBS	698	485	13528	1.67836	0.976057	0.0557994	2.20614
	GOTERM_BP_FAT	GO:0042325~regulation of phosphorylation	40	4.38596	0.00193846	ADCY1, CAV1, ENPP1, PKHD1, C5, TGFB3, FPR1, LPAR3, ZEB2, ITGB2, PRKAR2B, SPRY1, DIRAS3, INS, APOE, PLA2G1B, PDGFC, CERK, EGF, THBS1, PPP1R14A, GHR, IL6, VAV3, FLT1, SPHK1, PKIG, IGF1, IGF2, HGF, ADIPOQ, THY1, SH3BP5, VEGFC, CCND2, FABP4, PDGFRB, RELN, ENG, GAP43, CBS	698	466	13528	1.66361	0.997115	0.0790679	3.43534
	Annotation Cluster 7	Enrichment Score: 2.700522031315711
	Category	Term	Count	%	PValue	Genes	List Total	Pop Hits	Pop Total	Fold Enrichment	Bonferroni	Benjamini	FDR
endocytosis	GOTERM_BP_FAT	GO:0006897~endocytosis	24	2.63158	0.000993806	MRC1, RAMP3, CAV1, STON1, COLEC12, ZDHHC15, GATA2, AP1S2, CD36, CD93, PACSIN2, APOE, FOLR1, STAB1, FCGR1A, FCN1, FCER1G, CLEC7A, MERTK, THBS1, PTX3, LRP3, CD14, GHR	698	220	13528	2.1143	0.950054	0.0487202	1.77539
	GOTERM_BP_FAT	GO:0010324~membrane invagination	24	2.63158	0.000993806	MRC1, RAMP3, CAV1, STON1, COLEC12, ZDHHC15, GATA2, AP1S2, CD36, CD93, PACSIN2, APOE, FOLR1, STAB1, FCGR1A, FCN1, FCER1G, CLEC7A, MERTK, THBS1, PTX3, LRP3, CD14, GHR	698	220	13528	2.1143	0.950054	0.0487202	1.77539
	GOTERM_BP_FAT	GO:0016044~membrane organization	32	3.50877	0.00801366	CAV1, STON1, BNIP3, DTNBP1, NRCAM, GATA2, AP1S2, CD93, PACSIN2, FOLR1, APOE, FCGR1A, FCN1, FCER1G, TIE1, THBS1, PTX3, GHR, FTL, MRC1, RAMP3, VAV3, COLEC12, GIMAP1, ZDHHC15, CD36, STAB1, CLEC7A, MERTK, LRP3, CD14, MYH10	698	381	13528	1.62781	1	0.197849	13.494
	Annotation Cluster 8	Enrichment Score: 2.6475188896760007
	Category	Term	Count	%	PValue	Genes	List Total	Pop Hits	Pop Total	Fold Enrichment	Bonferroni	Benjamini	FDR
neuron development differentiation	GOTERM_BP_FAT	GO:0031344~regulation of cell projection organization	14	1.53509	0.000606298	LZTS1, NRP1, MAP1B, TGFB3, LRRC4C, SLIT2, THY1, AMIGO1, NRCAM, PRKCQ, APOE, NTRK2, NGFR, KALRN	698	89	13528	3.04871	0.839255	0.0345419	1.08669
	GOTERM_BP_FAT	GO:0010975~regulation of neuron projection development	12	1.31579	0.00084244	AMIGO1, NRCAM, LZTS1, NRP1, APOE, MAP1B, NTRK2, NGFR, LRRC4C, SLIT2, THY1, KALRN	698	70	13528	3.32247	0.921148	0.0428511	1.50692
	GOTERM_BP_FAT	GO:0010769~regulation of cell morphogenesis involved in differentiation	11	1.20614	0.00597015	AMIGO1, NRCAM, LZTS1, NRP1, APOE, MAP1B, TGFB3, NGFR, LRRC4C, SLIT2, THY1	698	77	13528	2.76873	1	0.1682	10.2266
	GOTERM_BP_FAT	GO:0050770~regulation of axonogenesis	9	0.986842	0.0084278	AMIGO1, NRCAM, NRP1, APOE, MAP1B, NGFR, LRRC4C, SLIT2, THY1	698	57	13528	3.06017	1	0.203684	14.1423
	Annotation Cluster 9	Enrichment Score: 2.554750201088645
	Category	Term	Count	%	PValue	Genes	List Total	Pop Hits	Pop Total	Fold Enrichment	Bonferroni	Benjamini	FDR
protein processing	GOTERM_BP_FAT	GO:0051605~protein maturation by peptide bond cleavage	14	1.53509	0.000432436	F11, C7, CORIN, C6, SEC11A, C5, C1R, CUZD1, C1S, PCSK2, ECE2, APOH, VSIG4, SRGN	698	86	13528	3.15506	0.728459	0.027356	0.77622
	GOTERM_BP_FAT	GO:0016485~protein processing	14	1.53509	0.00497148	F11, C7, CORIN, C6, SEC11A, C5, C1R, CUZD1, C1S, PCSK2, ECE2, APOH, VSIG4, SRGN	698	112	13528	2.42264	1	0.150643	8.58768
	GOTERM_BP_FAT	GO:0051604~protein maturation	14	1.53509	0.0100772	F11, C7, CORIN, C6, SEC11A, C5, C1R, CUZD1, C1S, PCSK2, ECE2, APOH, VSIG4, SRGN	698	122	13528	2.22406	1	0.218222	16.6793
	Annotation Cluster 10	Enrichment Score: 2.551245932414904
	Category	Term	Count	%	PValue	Genes	List Total	Pop Hits	Pop Total	Fold Enrichment	Bonferroni	Benjamini	FDR
neuron development differentiation	GOTERM_BP_FAT	GO:0048812~neuron projection morphogenesis	24	2.63158	0.00063636	NRP1, NDN, NRXN3, PKHD1, MAP1B, UCHL1, LIFR, NFASC, NRXN1, GAS1, CXCL12, GAS7, SLIT2, SLIT3, AMIGO1, NRCAM, CNTN4, RELN, NGFR, GAP43, DCLK1, MYH10, KALRN, FEZ1	698	213	13528	2.18378	0.853187	0.0355526	1.14028
	GOTERM_BP_FAT	GO:0000904~cell morphogenesis involved in differentiation	26	2.85088	0.000820717	NRP1, NDN, PKHD1, UCHL1, CXCL12, NRCAM, SLC1A3, DCLK1, COL18A1, NRXN3, MAP1B, NFASC, NRXN1, GAS1, HGF, SLIT2, SLIT3, AMIGO1, NOTCH4, CNTN4, RELN, NGFR, GAP43, MYH10, FEZ1, KALRN	698	244	13528	2.0652	0.915808	0.0424861	1.46833
	GOTERM_BP_FAT	GO:0007409~axonogenesis	22	2.41228	0.000975712	NRP1, NDN, NRXN3, PKHD1, UCHL1, MAP1B, NFASC, NRXN1, GAS1, CXCL12, SLIT2, SLIT3, AMIGO1, NRCAM, CNTN4, RELN, NGFR, GAP43, DCLK1, MYH10, FEZ1, KALRN	698	193	13528	2.20924	0.947252	0.0486453	1.74333
	GOTERM_BP_FAT	GO:0048667~cell morphogenesis involved in neuron differentiation	23	2.52193	0.00115958	NRP1, NDN, NRXN3, PKHD1, UCHL1, MAP1B, NFASC, NRXN1, GAS1, CXCL12, SLIT2, SLIT3, AMIGO1, NRCAM, SLC1A3, CNTN4, RELN, NGFR, GAP43, DCLK1, MYH10, FEZ1, KALRN	698	209	13528	2.13285	0.969712	0.0531748	2.06863
	GOTERM_BP_FAT	GO:0048858~cell projection morphogenesis	24	2.63158	0.00404287	NRP1, NDN, NRXN3, PKHD1, MAP1B, UCHL1, LIFR, NFASC, NRXN1, GAS1, CXCL12, GAS7, SLIT2, SLIT3, AMIGO1, NRCAM, CNTN4, RELN, NGFR, GAP43, DCLK1, MYH10, KALRN, FEZ1	698	245	13528	1.89856	0.999995	0.132358	7.03846
	GOTERM_BP_FAT	GO:0032990~cell part morphogenesis	24	2.63158	0.00680161	NRP1, NDN, NRXN3, PKHD1, MAP1B, UCHL1, LIFR, NFASC, NRXN1, GAS1, CXCL12, GAS7, SLIT2, SLIT3, AMIGO1, NRCAM, CNTN4, RELN, NGFR, GAP43, DCLK1, MYH10, KALRN, FEZ1	698	256	13528	1.81698	1	0.176389	11.5698
	GOTERM_BP_FAT	GO:0032989~cellular component morphogenesis	32	3.50877	0.0139063	NRP1, NDN, PKHD1, UCHL1, CXCL12, NRCAM, SLC1A3, OBSL1, DCLK1, COL18A1, PDPN, NRXN3, MAP1B, LIFR, NFASC, HGF, NRXN1, GAS1, GAS7, SLIT2, SLIT3, AMIGO1, NOTCH4, MYH11, RELN, CNTN4, NGFR, GAP43, KALRN, TMOD1, MYH10, FEZ1	698	397	13528	1.5622	1	0.261882	22.2984
	GOTERM_BP_FAT	GO:0000902~cell morphogenesis	29	3.17982	0.0172187	NRP1, NDN, PKHD1, UCHL1, CXCL12, NRCAM, SLC1A3, DCLK1, COL18A1, PDPN, NRXN3, MAP1B, LIFR, NFASC, NRXN1, GAS1, HGF, GAS7, SLIT2, SLIT3, AMIGO1, NOTCH4, RELN, CNTN4, NGFR, GAP43, KALRN, MYH10, FEZ1	698	356	13528	1.5788	1	0.294603	26.8688
	Annotation Cluster 11	Enrichment Score: 2.4649417212086697
	Category	Term	Count	%	PValue	Genes	List Total	Pop Hits	Pop Total	Fold Enrichment	Bonferroni	Benjamini	FDR
neuron development differentiation	GOTERM_BP_FAT	GO:0051960~regulation of nervous system development	21	2.30263	0.00215801	NRP1, LZTS1, DTX1, MAP1B, SOX5, IGF1, LRRC4C, SLIT2, THY1, AMIGO1, NRCAM, VEGFC, SERPINF1, CCND2, APOE, NTRK2, CNTN4, NGFR, EGF, CHRD, KALRN	698	192	13528	2.11981	0.998513	0.08423	3.81732
	GOTERM_BP_FAT	GO:0045664~regulation of neuron differentiation	16	1.75439	0.00350739	NRP1, LZTS1, DTX1, MAP1B, SOX5, LRRC4C, SLIT2, THY1, AMIGO1, NRCAM, CCND2, APOE, NTRK2, CNTN4, NGFR, KALRN	698	133	13528	2.33156	0.999975	0.118447	6.13386
	GOTERM_BP_FAT	GO:0050767~regulation of neurogenesis	18	1.97368	0.00532277	NRP1, LZTS1, DTX1, MAP1B, SOX5, LRRC4C, SLIT2, THY1, AMIGO1, NRCAM, VEGFC, SERPINF1, CCND2, APOE, NTRK2, CNTN4, NGFR, KALRN	698	166	13528	2.10156	1	0.155764	9.16736
	Annotation Cluster 12	Enrichment Score: 2.2827314678150894
	Category	Term	Count	%	PValue	Genes	List Total	Pop Hits	Pop Total	Fold Enrichment	Bonferroni	Benjamini	FDR
regulation of kinase activity	GOTERM_BP_FAT	GO:0042325~regulation of phosphorylation	40	4.38596	0.00193846	ADCY1, CAV1, ENPP1, PKHD1, C5, TGFB3, FPR1, LPAR3, ZEB2, ITGB2, PRKAR2B, SPRY1, DIRAS3, INS, APOE, PLA2G1B, PDGFC, CERK, EGF, THBS1, PPP1R14A, GHR, IL6, VAV3, FLT1, SPHK1, PKIG, IGF1, IGF2, HGF, ADIPOQ, THY1, SH3BP5, VEGFC, CCND2, FABP4, PDGFRB, RELN, ENG, GAP43, CBS	698	466	13528	1.66361	0.997115	0.0790679	3.43534
	GOTERM_BP_FAT	GO:0043549~regulation of kinase activity	31	3.39912	0.0057785	ADCY1, CAV1, PKHD1, C5, TGFB3, FPR1, LPAR3, ZEB2, PRKAR2B, SPRY1, DIRAS3, INS, APOE, PLA2G1B, PDGFC, CERK, EGF, THBS1, GHR, FLT1, VAV3, SPHK1, PKIG, IGF2, HGF, THY1, SH3BP5, CCND2, FABP4, RELN, GAP43, CBS	698	357	13528	1.68295	1	0.164789	9.91422
	GOTERM_BP_FAT	GO:0045859~regulation of protein kinase activity	30	3.28947	0.00658147	ADCY1, CAV1, PKHD1, C5, TGFB3, FPR1, LPAR3, ZEB2, PRKAR2B, SPRY1, DIRAS3, INS, APOE, PLA2G1B, PDGFC, CERK, EGF, THBS1, GHR, FLT1, SPHK1, PKIG, IGF2, HGF, THY1, SH3BP5, CCND2, FABP4, RELN, GAP43, CBS	698	345	13528	1.68531	1	0.177263	11.216
	GOTERM_BP_FAT	GO:0051338~regulation of transferase activity	31	3.39912	0.0100341	ADCY1, CAV1, PKHD1, C5, TGFB3, FPR1, LPAR3, ZEB2, PRKAR2B, SPRY1, DIRAS3, INS, APOE, PLA2G1B, PDGFC, CERK, EGF, THBS1, GHR, FLT1, VAV3, SPHK1, PKIG, IGF2, HGF, THY1, SH3BP5, CCND2, FABP4, RELN, GAP43, CBS	698	372	13528	1.61509	1	0.220532	16.6139
	Annotation Cluster 13	Enrichment Score: 1.9766460849017953
	Category	Term	Count	%	PValue	Genes	List Total	Pop Hits	Pop Total	Fold Enrichment	Bonferroni	Benjamini	FDR
regulation of kinase activity	GOTERM_BP_FAT	GO:0033674~positive regulation of kinase activity	22	2.41228	0.00830221	ADCY1, FLT1, VAV3, PKHD1, SPHK1, C5, FPR1, TGFB3, LPAR3, IGF2, ZEB2, HGF, PRKAR2B, CCND2, INS, PLA2G1B, RELN, PDGFC, CERK, THBS1, EGF, GAP43, GHR	698	231	13528	1.84582	1	0.202579	13.9462
	GOTERM_BP_FAT	GO:0045860~positive regulation of protein kinase activity	21	2.30263	0.0113251	ADCY1, FLT1, PKHD1, SPHK1, C5, FPR1, TGFB3, LPAR3, IGF2, ZEB2, HGF, PRKAR2B, CCND2, INS, PLA2G1B, RELN, PDGFC, CERK, THBS1, EGF, GAP43, GHR	698	223	13528	1.82512	1	0.236852	18.5513
	GOTERM_BP_FAT	GO:0051347~positive regulation of transferase activity	22	2.41228	0.0124976	ADCY1, FLT1, VAV3, PKHD1, SPHK1, C5, FPR1, TGFB3, LPAR3, IGF2, ZEB2, HGF, PRKAR2B, CCND2, INS, PLA2G1B, RELN, PDGFC, CERK, THBS1, EGF, GAP43, GHR	698	240	13528	1.7766	1	0.241703	20.2742
	Annotation Cluster 14	Enrichment Score: 1.960034743080968
	Category	Term	Count	%	PValue	Genes	List Total	Pop Hits	Pop Total	Fold Enrichment	Bonferroni	Benjamini	FDR
blood coagulation	GOTERM_BP_FAT	GO:0050878~regulation of body fluid levels	16	1.75439	0.00606022	F11, VIP, IL6, PTGER3, F13A1, EFEMP2, DTNBP1, CEL, VWF, FLI1, CD36, P2RX1, FBLN5, SERPINE1, APOH, TFPI2	698	141	13528	2.19927	1	0.168947	10.373
	GOTERM_BP_FAT	GO:0007599~hemostasis	13	1.42544	0.00957492	F11, IL6, F13A1, EFEMP2, DTNBP1, VWF, FLI1, CD36, P2RX1, FBLN5, SERPINE1, APOH, TFPI2	698	108	13528	2.33291	1	0.216261	15.9143
	GOTERM_BP_FAT	GO:0050817~coagulation	12	1.31579	0.0157804	F11, VWF, IL6, CD36, P2RX1, FBLN5, EFEMP2, F13A1, SERPINE1, APOH, TFPI2, DTNBP1	698	102	13528	2.28013	1	0.278291	24.9164
	GOTERM_BP_FAT	GO:0007596~blood coagulation	12	1.31579	0.0157804	F11, VWF, IL6, CD36, P2RX1, FBLN5, EFEMP2, F13A1, SERPINE1, APOH, TFPI2, DTNBP1	698	102	13528	2.28013	1	0.278291	24.9164
	Annotation Cluster 15	Enrichment Score: 1.8127179026651952
	Category	Term	Count	%	PValue	Genes	List Total	Pop Hits	Pop Total	Fold Enrichment	Bonferroni	Benjamini	FDR
peptidyl-serine modification	GOTERM_BP_FAT	GO:0019800~peptide cross-linking via chondroitin 4-sulfate glycosaminoglycan	4	0.438596	0.00242247	BGN, EGFLAM, MAMDC2, DCN	698	6	13528	12.9207	0.999331	0.0873266	4.27554
	GOTERM_BP_FAT	GO:0030204~chondroitin sulfate metabolic process	5	0.548246	0.0046192	BGN, EGFLAM, MAMDC2, CHST12, DCN	698	14	13528	6.92182	0.999999	0.143628	8.00285
	GOTERM_BP_FAT	GO:0018209~peptidyl-serine modification	4	0.438596	0.325853	BGN, EGFLAM, MAMDC2, DCN	698	39	13528	1.9878	1	0.934914	99.9178
	Annotation Cluster 16	Enrichment Score: 1.750956639894737
	Category	Term	Count	%	PValue	Genes	List Total	Pop Hits	Pop Total	Fold Enrichment	Bonferroni	Benjamini	FDR
cell migration	GOTERM_BP_FAT	GO:0040017~positive regulation of locomotion	12	1.31579	0.0119256	COL18A1, IL6, FLT1, PDPN, SPHK1, IGF1, IGF2, CXCL12, SLIT2, VEGFC, INS, PDGFRB, THBS1	698	98	13528	2.37319	1	0.241208	19.438
	GOTERM_BP_FAT	GO:0030335~positive regulation of cell migration	11	1.20614	0.0159947	COL18A1, VEGFC, IL6, FLT1, PDPN, INS, SPHK1, PDGFRB, IGF1, IGF2, THBS1, CXCL12	698	89	13528	2.39542	1	0.279898	25.2104
	GOTERM_BP_FAT	GO:0051272~positive regulation of cell motion	11	1.20614	0.029287	COL18A1, VEGFC, IL6, FLT1, PDPN, INS, SPHK1, PDGFRB, IGF1, IGF2, THBS1, CXCL12	698	98	13528	2.17543	1	0.397192	41.4634
	Annotation Cluster 17	Enrichment Score: 1.6981977985413126
	Category	Term	Count	%	PValue	Genes	List Total	Pop Hits	Pop Total	Fold Enrichment	Bonferroni	Benjamini	FDR
defense response	GOTERM_BP_FAT	GO:0031348~negative regulation of defense response	7	0.767544	0.00949509	A2M, SERPINF1, INS, APOE, IGF2, CALCRL, ADIPOQ, ADA	698	36	13528	3.76855	1	0.217897	15.7921
	GOTERM_BP_FAT	GO:0050728~negative regulation of inflammatory response	6	0.657895	0.019972	SERPINF1, INS, APOE, IGF2, CALCRL, ADIPOQ, ADA	698	31	13528	3.75118	1	0.321108	30.4733
	GOTERM_BP_FAT	GO:0032102~negative regulation of response to external stimulus	7	0.767544	0.0424116	SERPINF1, INS, APOE, IGF2, CALCRL, GREM1, ADIPOQ, ADA	698	50	13528	2.71335	1	0.472859	54.1946
	Annotation Cluster 18	Enrichment Score: 1.6709662719896627
	Category	Term	Count	%	PValue	Genes	List Total	Pop Hits	Pop Total	Fold Enrichment	Bonferroni	Benjamini	FDR
phosphorylation	GOTERM_BP_FAT	GO:0010562~positive regulation of phosphorus metabolic process	13	1.42544	0.00522897	DLC1, IL6, CAV1, TGFB3, IGF1, IGF2, ADIPOQ, VEGFC, CCND2, INS, EGF, THBS1, ENG, GHR	698	100	13528	2.51954	1	0.154731	9.01292
	GOTERM_BP_FAT	GO:0045937~positive regulation of phosphate metabolic process	13	1.42544	0.00522897	DLC1, IL6, CAV1, TGFB3, IGF1, IGF2, ADIPOQ, VEGFC, CCND2, INS, EGF, THBS1, ENG, GHR	698	100	13528	2.51954	1	0.154731	9.01292
	GOTERM_BP_FAT	GO:0042327~positive regulation of phosphorylation	12	1.31579	0.0110851	IL6, CAV1, TGFB3, IGF1, IGF2, ADIPOQ, VEGFC, INS, CCND2, THBS1, EGF, ENG, GHR	698	97	13528	2.39766	1	0.234054	18.1945
	GOTERM_BP_FAT	GO:0001934~positive regulation of protein amino acid phosphorylation	10	1.09649	0.0394174	VEGFC, CAV1, IL6, CCND2, INS, TGFB3, IGF1, IGF2, ENG, ADIPOQ, GHR	698	89	13528	2.17765	1	0.456155	51.5444
	GOTERM_BP_FAT	GO:0031401~positive regulation of protein modification process	12	1.31579	0.369749	DLC1, IL6, CAV1, TGFB3, IGF1, IGF2, ADIPOQ, VEGFC, INS, CCND2, PSMD6, ENG, GHR	698	187	13528	1.24371	1	0.953332	99.9756
	Annotation Cluster 19	Enrichment Score: 1.5279919000247586
	Category	Term	Count	%	PValue	Genes	List Total	Pop Hits	Pop Total	Fold Enrichment	Bonferroni	Benjamini	FDR
polysaccharide metabolic process	GOTERM_BP_FAT	GO:0030203~glycosaminoglycan metabolic process	9	0.986842	0.00679332	BGN, EGFLAM, MAMDC2, B3GALT6, HAS1, CHST12, CHST9, ITIH5, DCN	698	55	13528	3.17145	1	0.177713	11.5565
	GOTERM_BP_FAT	GO:0006022~aminoglycan metabolic process	9	0.986842	0.0180035	BGN, EGFLAM, MAMDC2, B3GALT6, HAS1, CHST12, CHST9, ITIH5, DCN	698	65	13528	2.68354	1	0.302494	27.9139
	GOTERM_BP_FAT	GO:0005976~polysaccharide metabolic process	9	0.986842	0.213101	BGN, EGFLAM, MAMDC2, B3GALT6, HAS1, CHST12, CHST9, ITIH5, DCN	698	111	13528	1.57144	1	0.857292	98.6669
	Annotation Cluster 20	Enrichment Score: 1.422936657864981
	Category	Term	Count	%	PValue	Genes	List Total	Pop Hits	Pop Total	Fold Enrichment	Bonferroni	Benjamini	FDR
response to acid	GOTERM_BP_FAT	GO:0001101~response to acid	6	0.657895	0.00671627	SLC1A2, CCL2, BCHE, PEMT, CDO1, TIMP3	698	24	13528	4.84527	1	0.177412	11.4328
	GOTERM_BP_FAT	GO:0043200~response to amino acid stimulus	5	0.548246	0.00971134	SLC1A2, CCL2, PEMT, CDO1, TIMP3	698	17	13528	5.70032	1	0.215794	16.1227
	GOTERM_BP_FAT	GO:0014075~response to amine stimulus	5	0.548246	0.139446	SLC1A2, CCL2, PEMT, CDO1, TIMP3	698	39	13528	2.48475	1	0.759106	93.3172
	GOTERM_BP_FAT	GO:0010243~response to organic nitrogen	6	0.657895	0.223583	SLC1A2, CCL2, VKORC1, PEMT, CDO1, TIMP3	698	63	13528	1.84582	1	0.864927	98.953
	Annotation Cluster 21	Enrichment Score: 1.245363359319323
	Category	Term	Count	%	PValue	Genes	List Total	Pop Hits	Pop Total	Fold Enrichment	Bonferroni	Benjamini	FDR
sex differentiation	GOTERM_BP_FAT	GO:0048608~reproductive structure development	13	1.42544	0.0291493	AR, FGF7, LEPR, FOXO3, PGR, TCF21, SFRP1, OSR1, CCND2, KGFLP2, ADAMTS1, ERCC1, TEX11	698	126	13528	1.99964	1	0.39746	41.3136
	GOTERM_BP_FAT	GO:0008406~gonad development	11	1.20614	0.063051	PGR, AR, FGF7, OSR1, CCND2, LEPR, KGFLP2, ADAMTS1, FOXO3, ERCC1, TEX11	698	112	13528	1.9035	1	0.554154	69.0662
	GOTERM_BP_FAT	GO:0045137~development of primary sexual characteristics	12	1.31579	0.0631883	PGR, AR, FGF7, OSR1, TBX3, CCND2, LEPR, KGFLP2, ADAMTS1, FOXO3, ERCC1, TEX11	698	127	13528	1.83128	1	0.553485	69.1478
	GOTERM_BP_FAT	GO:0007548~sex differentiation	13	1.42544	0.0898649	AR, FGF7, TBX3, LEPR, FOXO3, PGR, TCF21, OSR1, CCND2, KGFLP2, ADAMTS1, ERCC1, TEX11	698	151	13528	1.66857	1	0.639723	81.6664
	Annotation Cluster 22	Enrichment Score: 1.2428879083515367
	Category	Term	Count	%	PValue	Genes	List Total	Pop Hits	Pop Total	Fold Enrichment	Bonferroni	Benjamini	FDR
protein localization and transport	GOTERM_BP_FAT	GO:0050708~regulation of protein secretion	9	0.986842	0.0093476	VEGFC, PRKCQ, IL6, INS, PLA2G1B, TGFB3, IGF2, EGF, NLRP3, SRGN	698	58	13528	3.00741	1	0.216527	15.5659
	GOTERM_BP_FAT	GO:0051223~regulation of protein transport	11	1.20614	0.069341	VEGFC, PRKCQ, IL6, INS, PKIG, PLA2G1B, TGFB3, IGF2, EGF, NLRP3, FLNA, SRGN	698	114	13528	1.87011	1	0.572322	72.6014
	GOTERM_BP_FAT	GO:0070201~regulation of establishment of protein localization	11	1.20614	0.0943968	VEGFC, PRKCQ, IL6, INS, PKIG, PLA2G1B, TGFB3, IGF2, EGF, NLRP3, FLNA, SRGN	698	121	13528	1.76192	1	0.652159	83.2432
	GOTERM_BP_FAT	GO:0032880~regulation of protein localization	11	1.20614	0.174502	VEGFC, PRKCQ, IL6, INS, PKIG, PLA2G1B, TGFB3, IGF2, EGF, NLRP3, FLNA, SRGN	698	138	13528	1.54487	1	0.810938	96.841
	Annotation Cluster 23	Enrichment Score: 1.19954477759856
	Category	Term	Count	%	PValue	Genes	List Total	Pop Hits	Pop Total	Fold Enrichment	Bonferroni	Benjamini	FDR
ovulation	GOTERM_BP_FAT	GO:0022602~ovulation cycle process	8	0.877193	0.0394669	PGR, FGF7, CCND2, LEPR, TGFB3, KGFLP2, ADAMTS1, FOXO3	698	62	13528	2.50079	1	0.45492	51.5894
	GOTERM_BP_FAT	GO:0042698~ovulation cycle	8	0.877193	0.0561913	PGR, FGF7, CCND2, LEPR, TGFB3, KGFLP2, ADAMTS1, FOXO3	698	67	13528	2.31416	1	0.531326	64.7216
	GOTERM_BP_FAT	GO:0046660~female sex differentiation	8	0.877193	0.0639463	PGR, FGF7, TBX3, CCND2, LEPR, KGFLP2, ADAMTS1, FOXO3	698	69	13528	2.24708	1	0.554984	69.5945
	GOTERM_BP_FAT	GO:0046545~development of primary female sexual characteristics	8	0.877193	0.0639463	PGR, FGF7, TBX3, CCND2, LEPR, KGFLP2, ADAMTS1, FOXO3	698	69	13528	2.24708	1	0.554984	69.5945
	GOTERM_BP_FAT	GO:0008585~female gonad development	7	0.767544	0.110852	PGR, FGF7, CCND2, LEPR, KGFLP2, ADAMTS1, FOXO3	698	64	13528	2.11981	1	0.702618	87.9576
	Annotation Cluster 24	Enrichment Score: 1.1824821725011432
	Category	Term	Count	%	PValue	Genes	List Total	Pop Hits	Pop Total	Fold Enrichment	Bonferroni	Benjamini	FDR
respiratory system development	GOTERM_BP_FAT	GO:0060541~respiratory system development	11	1.20614	0.051607	TCF21, FGF7, PDPN, CRISPLD2, ALDH1A3, TGFB3, MGP, ZFPM2, KGFLP2, ADA, FOXP2	698	108	13528	1.974	1	0.512943	61.5036
	GOTERM_BP_FAT	GO:0030324~lung development	10	1.09649	0.0688461	TCF21, FGF7, PDPN, CRISPLD2, TGFB3, MGP, ZFPM2, KGFLP2, ADA, FOXP2	698	99	13528	1.95769	1	0.573924	72.3377
	GOTERM_BP_FAT	GO:0030323~respiratory tube development	10	1.09649	0.0797931	TCF21, FGF7, PDPN, CRISPLD2, TGFB3, MGP, ZFPM2, KGFLP2, ADA, FOXP2	698	102	13528	1.90011	1	0.606127	77.6458
	Annotation Cluster 25	Enrichment Score: 1.1761863169381046
	Category	Term	Count	%	PValue	Genes	List Total	Pop Hits	Pop Total	Fold Enrichment	Bonferroni	Benjamini	FDR
ovulation	GOTERM_BP_FAT	GO:0001542~ovulation from ovarian follicle	4	0.438596	0.021131	PGR, LEPR, ADAMTS1, FOXO3	698	12	13528	6.46036	1	0.329561	31.9398
	GOTERM_BP_FAT	GO:0030728~ovulation	4	0.438596	0.0323897	PGR, LEPR, ADAMTS1, FOXO3	698	14	13528	5.53745	1	0.415164	44.7441
	GOTERM_BP_FAT	GO:0007292~female gamete generation	5	0.548246	0.432627	PGR, LEPR, ADAMTS1, FOXO3, ERCC1	698	65	13528	1.49085	1	0.972153	99.9963
	Annotation Cluster 26	Enrichment Score: 1.1615211346990015
	Category	Term	Count	%	PValue	Genes	List Total	Pop Hits	Pop Total	Fold Enrichment	Bonferroni	Benjamini	FDR
protein localization and transport	GOTERM_BP_FAT	GO:0050714~positive regulation of protein secretion	7	0.767544	0.0176538	VEGFC, PRKCQ, IL6, INS, PLA2G1B, TGFB3, IGF2, NLRP3	698	41	13528	3.30897	1	0.299193	27.4499
	GOTERM_BP_FAT	GO:0051222~positive regulation of protein transport	8	0.877193	0.0561913	VEGFC, PRKCQ, IL6, INS, PLA2G1B, TGFB3, IGF2, NLRP3, FLNA	698	67	13528	2.31416	1	0.531326	64.7216
	GOTERM_BP_FAT	GO:0051047~positive regulation of secretion	8	0.877193	0.330316	VEGFC, PRKCQ, IL6, INS, AVPR1A, PLA2G1B, TGFB3, IGF2, NLRP3	698	109	13528	1.42247	1	0.937046	99.9271
	Annotation Cluster 27	Enrichment Score: 1.1224907062131102
	Category	Term	Count	%	PValue	Genes	List Total	Pop Hits	Pop Total	Fold Enrichment	Bonferroni	Benjamini	FDR
apoptosis	GOTERM_BP_FAT	GO:0043066~negative regulation of apoptosis	26	2.85088	0.0689432	CCL2, TGFB3, BNIP3, ADA, CITED2, APOE, ALB, INS, COMP, APOH, THBS1, TWIST2, ERCC1, ANGPTL4, IL6, TBX3, SOCS2, CRYAB, SPHK1, ESR1, IGF1, IGF2, HGF, GIMAP1, SFRP1, NGFR, TEX11	698	354	13528	1.42347	1	0.573016	72.3896
	GOTERM_BP_FAT	GO:0043069~negative regulation of programmed cell death	26	2.85088	0.0776084	CCL2, TGFB3, BNIP3, ADA, CITED2, APOE, ALB, INS, COMP, APOH, THBS1, TWIST2, ERCC1, ANGPTL4, IL6, TBX3, SOCS2, CRYAB, SPHK1, ESR1, IGF1, IGF2, HGF, GIMAP1, SFRP1, NGFR, TEX11	698	359	13528	1.40364	1	0.598255	76.6701
	GOTERM_BP_FAT	GO:0060548~negative regulation of cell death	26	2.85088	0.0801914	CCL2, TGFB3, BNIP3, ADA, CITED2, APOE, ALB, INS, COMP, APOH, THBS1, TWIST2, ERCC1, ANGPTL4, IL6, TBX3, SOCS2, CRYAB, SPHK1, ESR1, IGF1, IGF2, HGF, GIMAP1, SFRP1, NGFR, TEX11	698	360	13528	1.39975	1	0.606671	77.8195
	Annotation Cluster 28	Enrichment Score: 1.07999454050569
	Category	Term	Count	%	PValue	Genes	List Total	Pop Hits	Pop Total	Fold Enrichment	Bonferroni	Benjamini	FDR
complement activation	GOTERM_BP_FAT	GO:0006958~complement activation, classical pathway	5	0.548246	0.0596985	C7, C6, C5, C1R, C1S	698	29	13528	3.34157	1	0.547445	67.0103
	GOTERM_BP_FAT	GO:0006956~complement activation	6	0.657895	0.0632393	C7, C6, C5, C1R, C1S, VSIG4	698	42	13528	2.76873	1	0.552313	69.1781
	GOTERM_BP_FAT	GO:0002541~activation of plasma proteins involved in acute inflammatory response	6	0.657895	0.0686709	C7, C6, C5, C1R, C1S, VSIG4	698	43	13528	2.70434	1	0.574409	72.2438
	GOTERM_BP_FAT	GO:0002455~humoral immune response mediated by circulating immunoglobulin	5	0.548246	0.073043	C7, C6, C5, C1R, C1S	698	31	13528	3.12598	1	0.582112	74.4998
	GOTERM_BP_FAT	GO:0002253~activation of immune response	8	0.877193	0.210245	C7, C6, C5, C1R, C1S, CLEC7A, VSIG4, THY1	698	94	13528	1.64945	1	0.856069	98.577
	Annotation Cluster 29	Enrichment Score: 1.0246176204628732
	Category	Term	Count	%	PValue	Genes	List Total	Pop Hits	Pop Total	Fold Enrichment	Bonferroni	Benjamini	FDR
cell development and differentiation	GOTERM_BP_FAT	GO:0001885~endothelial cell development	3	0.328947	0.0468401	COL18A1, NOTCH4, ENG	698	7	13528	8.30618	1	0.494408	57.8644
	GOTERM_BP_FAT	GO:0002064~epithelial cell development	4	0.438596	0.0909002	PGR, COL18A1, NOTCH4, ENG	698	21	13528	3.69164	1	0.641505	82.0385
	GOTERM_BP_FAT	GO:0045446~endothelial cell differentiation	3	0.328947	0.198137	COL18A1, NOTCH4, ENG	698	16	13528	3.63395	1	0.841754	98.1282
	Annotation Cluster 30	Enrichment Score: 1.0232414368810132
	Category	Term	Count	%	PValue	Genes	List Total	Pop Hits	Pop Total	Fold Enrichment	Bonferroni	Benjamini	FDR
locomotory behavior	GOTERM_BP_FAT	GO:0006935~chemotaxis	14	1.53509	0.0697131	IL6, CCL2, CMKLR1, C5, FPR1, ITGB2, CXCL12, SLIT2, CCL13, CCL14, ECSCR, PLA2G1B, PDGFRB, ENG	698	160	13528	1.69585	1	0.572916	72.798
	GOTERM_BP_FAT	GO:0042330~taxis	14	1.53509	0.0697131	IL6, CCL2, CMKLR1, C5, FPR1, ITGB2, CXCL12, SLIT2, CCL13, CCL14, ECSCR, PLA2G1B, PDGFRB, ENG	698	160	13528	1.69585	1	0.572916	72.798
	GOTERM_BP_FAT	GO:0007626~locomotory behavior	19	2.08333	0.175246	IL6, CCL2, CMKLR1, UCHL1, C5, FPR1, ITGB2, CXCL12, SLIT2, CCL13, CCL14, PTGDS, ECSCR, PLA2G1B, ABAT, PDGFRB, RELN, SEPP1, ENG, HPGDS	698	274	13528	1.34394	1	0.810604	96.8919
	Annotation Cluster 31	Enrichment Score: 1.0165340751188776
	Category	Term	Count	%	PValue	Genes	List Total	Pop Hits	Pop Total	Fold Enrichment	Bonferroni	Benjamini	FDR
metal ion homeostasis	GOTERM_BP_FAT	GO:0006875~cellular metal ion homeostasis	17	1.86404	0.0463406	FXYD1, C7, CAV1, CCL2, PTGER3, TRPC6, LPAR3, CXCL12, AGTR1, S1PR3, CCL13, CCL14, APOE, PLN, AVPR1A, RGN, STC1	698	196	13528	1.68101	1	0.49389	57.4649
	GOTERM_BP_FAT	GO:0006874~cellular calcium ion homeostasis	16	1.75439	0.0510099	FXYD1, CAV1, CCL2, PTGER3, TRPC6, LPAR3, CXCL12, AGTR1, S1PR3, CCL13, CCL14, APOE, PLN, AVPR1A, RGN, STC1	698	183	13528	1.69452	1	0.513522	61.0646
	GOTERM_BP_FAT	GO:0055074~calcium ion homeostasis	16	1.75439	0.0616383	FXYD1, CAV1, CCL2, PTGER3, TRPC6, LPAR3, CXCL12, AGTR1, S1PR3, CCL13, CCL14, APOE, PLN, AVPR1A, RGN, STC1	698	188	13528	1.64945	1	0.553213	68.2151
	GOTERM_BP_FAT	GO:0055065~metal ion homeostasis	17	1.86404	0.0643736	FXYD1, C7, CAV1, CCL2, PTGER3, TRPC6, LPAR3, CXCL12, AGTR1, S1PR3, CCL13, CCL14, APOE, PLN, AVPR1A, RGN, STC1	698	205	13528	1.60721	1	0.556003	69.8436
	GOTERM_BP_FAT	GO:0030005~cellular di-, tri-valent inorganic cation homeostasis	17	1.86404	0.126654	FXYD1, CAV1, CCL2, PTGER3, TRPC6, LPAR3, CXCL12, AGTR1, S1PR3, CCL13, CCL14, APOE, PLN, AVPR1A, RGN, STC1, FTL	698	227	13528	1.45145	1	0.738848	91.2822
	GOTERM_BP_FAT	GO:0030003~cellular cation homeostasis	18	1.97368	0.163107	FXYD1, C7, CAV1, CCL2, PTGER3, TRPC6, LPAR3, CXCL12, AGTR1, S1PR3, CCL13, CCL14, APOE, PLN, AVPR1A, RGN, STC1, FTL	698	254	13528	1.37346	1	0.795621	95.956
	GOTERM_BP_FAT	GO:0055066~di-, tri-valent inorganic cation homeostasis	17	1.86404	0.17172	FXYD1, CAV1, CCL2, PTGER3, TRPC6, LPAR3, CXCL12, AGTR1, S1PR3, CCL13, CCL14, APOE, PLN, AVPR1A, RGN, STC1, FTL	698	239	13528	1.37857	1	0.807169	96.6436
	GOTERM_BP_FAT	GO:0055080~cation homeostasis	19	2.08333	0.221635	SLC9A9, FXYD1, C7, CAV1, CCL2, PTGER3, TRPC6, LPAR3, CXCL12, AGTR1, S1PR3, CCL13, CCL14, APOE, PLN, AVPR1A, RGN, STC1, FTL	698	286	13528	1.28755	1	0.864374	98.9047
	Annotation Cluster 32	Enrichment Score: 1.0066150570805208
	Category	Term	Count	%	PValue	Genes	List Total	Pop Hits	Pop Total	Fold Enrichment	Bonferroni	Benjamini	FDR
serine family amino acid metabolic process	GOTERM_BP_FAT	GO:0006563~L-serine metabolic process	3	0.328947	0.0603616	SRR, PHGDH, CBS	698	8	13528	7.26791	1	0.550005	67.4269
	GOTERM_BP_FAT	GO:0009070~serine family amino acid biosynthetic process	3	0.328947	0.107152	SRR, PHGDH, CBS	698	11	13528	5.28575	1	0.692087	87.022
	GOTERM_BP_FAT	GO:0009069~serine family amino acid metabolic process	4	0.438596	0.147705	SRR, PHGDH, CDO1, CBS	698	26	13528	2.98171	1	0.772856	94.383
	Annotation Cluster 33	Enrichment Score: 1.0056148399728588
	Category	Term	Count	%	PValue	Genes	List Total	Pop Hits	Pop Total	Fold Enrichment	Bonferroni	Benjamini	FDR
leukocyte migration	GOTERM_BP_FAT	GO:0002688~regulation of leukocyte chemotaxis	4	0.438596	0.0164684	IL6, GREM1, THBS1, CXCL12	698	11	13528	7.04767	1	0.285305	25.8563
	GOTERM_BP_FAT	GO:0050920~regulation of chemotaxis	5	0.548246	0.073043	IL6, GREM1, THBS1, CXCL12, SLIT2	698	31	13528	3.12598	1	0.582112	74.4998
	GOTERM_BP_FAT	GO:0002690~positive regulation of leukocyte chemotaxis	3	0.328947	0.0906638	IL6, THBS1, CXCL12	698	10	13528	5.81433	1	0.641816	81.9541
	GOTERM_BP_FAT	GO:0002687~positive regulation of leukocyte migration	3	0.328947	0.179143	IL6, THBS1, CXCL12	698	15	13528	3.87622	1	0.815534	97.1461
	GOTERM_BP_FAT	GO:0050921~positive regulation of chemotaxis	4	0.438596	0.186064	IL6, THBS1, CXCL12, SLIT2	698	29	13528	2.67325	1	0.825861	97.5499
	GOTERM_BP_FAT	GO:0048520~positive regulation of behavior	4	0.438596	0.254558	IL6, THBS1, CXCL12, SLIT2	698	34	13528	2.28013	1	0.8913	99.4972

## Sheet: C2
function clusters	Annotation Cluster 1	Enrichment Score: 2.4273288610800114
	Category	Term	Count	%	PValue	Genes	List Total	Pop Hits	Pop Total	Fold Enrichment	Bonferroni	Benjamini	FDR
phosphate metabolic process	GOTERM_BP_FAT	GO:0006796~phosphate metabolic process	29	8.47953	0.00355543	FRK, STK31, CDC14B, NDUFB8, PTPLAD1, CASK, PMVK, EPHB4, PTK2, PTK6, BCR, PTPRF, PIK3CB, PIK3C2A, TGFBR1, PIK3C2B, PRKCI, PI4KA, ATP6V1H, DGUOK, ATP6V1D, PPA2, GAK, STYK1, RSRC1, ROR1, ERN2, MAP3K13, PPP2R2A	228	973	13528	1.76841	0.991751	0.616931	5.67366
	GOTERM_BP_FAT	GO:0006793~phosphorus metabolic process	29	8.47953	0.00355543	FRK, STK31, CDC14B, NDUFB8, PTPLAD1, CASK, PMVK, EPHB4, PTK2, PTK6, BCR, PTPRF, PIK3CB, PIK3C2A, TGFBR1, PIK3C2B, PRKCI, PI4KA, ATP6V1H, DGUOK, ATP6V1D, PPA2, GAK, STYK1, RSRC1, ROR1, ERN2, MAP3K13, PPP2R2A	228	973	13528	1.76841	0.991751	0.616931	5.67366
	GOTERM_BP_FAT	GO:0016310~phosphorylation	25	7.30994	0.00413265	FRK, STK31, NDUFB8, PTPLAD1, CASK, PMVK, EPHB4, PTK2, PTK6, BCR, PIK3CB, PIK3C2A, TGFBR1, PIK3C2B, PRKCI, PI4KA, ATP6V1H, DGUOK, ATP6V1D, GAK, STYK1, RSRC1, ROR1, ERN2, MAP3K13	228	800	13528	1.85417	0.996221	0.605329	6.56575
	Annotation Cluster 2	Enrichment Score: 1.5822624413004893
	Category	Term	Count	%	PValue	Genes	List Total	Pop Hits	Pop Total	Fold Enrichment	Bonferroni	Benjamini	FDR
phosphorylation	GOTERM_BP_FAT	GO:0046854~phosphoinositide phosphorylation	4	1.16959	0.00182754	PIK3C2A, PIK3CB, PIK3C2B, PI4KA	228	15	13528	15.8222	0.914902	0.708285	2.9552
	GOTERM_BP_FAT	GO:0046834~lipid phosphorylation	4	1.16959	0.00222161	PIK3C2A, PIK3CB, PIK3C2B, PI4KA	228	16	13528	14.8333	0.950005	0.63161	3.58158
	KEGG_PATHWAY	hsa00562:Inositol phosphate metabolism	5	1.46199	0.0183637	PLCB4, PIK3C2A, PIK3CB, PIK3C2B, PI4KA	97	54	5085	4.85395	0.864896	0.393729	18.8359
	GOTERM_BP_FAT	GO:0048015~phosphoinositide-mediated signaling	5	1.46199	0.0605528	PIK3C2A, GSN, PIK3CB, PIK3C2B, PI4KA	228	88	13528	3.37121	1	0.974221	64.097
	GOTERM_BP_FAT	GO:0030258~lipid modification	4	1.16959	0.109522	PIK3C2A, PIK3CB, PIK3C2B, PI4KA	228	69	13528	3.43961	1	0.977872	85.0766
	GOTERM_BP_FAT	GO:0030384~phosphoinositide metabolic process	4	1.16959	0.124035	PIK3C2A, PIK3CB, PIK3C2B, PI4KA	228	73	13528	3.25114	1	0.981014	88.6018
	GOTERM_BP_FAT	GO:0006650~glycerophospholipid metabolic process	5	1.46199	0.136927	PLD1, PIK3C2A, PIK3CB, PIK3C2B, PI4KA	228	118	13528	2.51412	1	0.981072	91.0621
	Annotation Cluster 3	Enrichment Score: 1.4525046219053177
	Category	Term	Count	%	PValue	Genes	List Total	Pop Hits	Pop Total	Fold Enrichment	Bonferroni	Benjamini	FDR
protein localization and transport	GOTERM_BP_FAT	GO:0015031~protein transport	21	6.14035	0.0316409	CHMP2A, TSPO, CLTB, SCAMP2, AP1M2, NAPG, AP1G2, RASEF, MLPH, PRKCI, VPS37B, SELENBP1, ARFIP1, BACE2, RAB14, SORT1, RAB25, ATG16L1, RAB27B, RAB27A, AP3B1	228	762	13528	1.63517	1	0.954657	40.9785
	GOTERM_BP_FAT	GO:0045184~establishment of protein localization	21	6.14035	0.0343426	CHMP2A, TSPO, CLTB, SCAMP2, AP1M2, NAPG, AP1G2, RASEF, MLPH, PRKCI, VPS37B, SELENBP1, ARFIP1, BACE2, RAB14, SORT1, RAB25, ATG16L1, RAB27B, RAB27A, AP3B1	228	769	13528	1.62029	1	0.937273	43.6216
	GOTERM_BP_FAT	GO:0008104~protein localization	23	6.72515	0.0404022	CHMP2A, TSPO, AP1M2, CLTB, SCAMP2, NAPG, AP1G2, RASEF, MLPH, SLC9A2, PRKCI, VPS37B, SELENBP1, ARFIP1, AMN, BACE2, RAB14, SORT1, RAB25, ATG16L1, RAB27B, RAB27A, AP3B1	228	882	13528	1.54724	1	0.937812	49.1513
	Annotation Cluster 4	Enrichment Score: 1.2458711701501228
	Category	Term	Count	%	PValue	Genes	List Total	Pop Hits	Pop Total	Fold Enrichment	Bonferroni	Benjamini	FDR
pigmentation during development	GOTERM_BP_FAT	GO:0030318~melanocyte differentiation	3	0.877193	0.0223388	MLPH, GFPT1, RAB27A	228	14	13528	12.7143	1	0.965996	30.9604
	GOTERM_BP_FAT	GO:0050931~pigment cell differentiation	3	0.877193	0.0254944	MLPH, GFPT1, RAB27A	228	15	13528	11.8667	1	0.957675	34.5253
	GOTERM_BP_FAT	GO:0048066~pigmentation during development	3	0.877193	0.070015	MLPH, GFPT1, RAB27A	228	26	13528	6.84615	1	0.969558	69.5888
	GOTERM_BP_FAT	GO:0043473~pigmentation	3	0.877193	0.260508	MLPH, GFPT1, RAB27A	228	59	13528	3.01695	1	0.980682	99.291
	Annotation Cluster 5	Enrichment Score: 1.09074121115705
	Category	Term	Count	%	PValue	Genes	List Total	Pop Hits	Pop Total	Fold Enrichment	Bonferroni	Benjamini	FDR
cation homeostasis	GOTERM_BP_FAT	GO:0006885~regulation of pH	4	1.16959	0.0190313	SLC9A8, SLC9A2, ATP6V1H, SLC9A1	228	34	13528	6.98039	1	0.975214	27.0287
	GOTERM_BP_FAT	GO:0055067~monovalent inorganic cation homeostasis	4	1.16959	0.0394941	SLC9A8, SLC9A2, ATP6V1H, SLC9A1	228	45	13528	5.27407	1	0.942543	48.3564
	GOTERM_BP_FAT	GO:0055080~cation homeostasis	5	1.46199	0.710847	SLC9A8, PIK3CB, SLC9A2, ATP6V1H, SLC9A1	228	286	13528	1.0373	1	0.998648	100
	Annotation Cluster 6	Enrichment Score: 1.0132782012200452
	Category	Term	Count	%	PValue	Genes	List Total	Pop Hits	Pop Total	Fold Enrichment	Bonferroni	Benjamini	FDR
glycosylation	GOTERM_BP_FAT	GO:0070085~glycosylation	6	1.75439	0.0644428	GALNT10, FUT8, ALG1, GALNT6, MGAT5, TM4SF5	228	128	13528	2.78125	1	0.972377	66.4587
	GOTERM_BP_FAT	GO:0006486~protein amino acid glycosylation	6	1.75439	0.0644428	GALNT10, FUT8, ALG1, GALNT6, MGAT5, TM4SF5	228	128	13528	2.78125	1	0.972377	66.4587
	GOTERM_BP_FAT	GO:0043413~biopolymer glycosylation	6	1.75439	0.0644428	GALNT10, FUT8, ALG1, GALNT6, MGAT5, TM4SF5	228	128	13528	2.78125	1	0.972377	66.4587
	GOTERM_BP_FAT	GO:0009101~glycoprotein biosynthetic process	6	1.75439	0.127089	GALNT10, FUT8, ALG1, GALNT6, MGAT5, TM4SF5	228	158	13528	2.25316	1	0.979666	89.2363
	GOTERM_BP_FAT	GO:0009100~glycoprotein metabolic process	6	1.75439	0.252335	GALNT10, FUT8, ALG1, GALNT6, MGAT5, TM4SF5	228	202	13528	1.76238	1	0.980101	99.151

## Sheet: C3
function clusters	Annotation Cluster 1	Enrichment Score: 2.060870276091824
	Category	Term	Count	%	PValue	Genes	List Total	Pop Hits	Pop Total	Fold Enrichment	Bonferroni	Benjamini	FDR
acid biosynthetic process	GOTERM_BP_FAT	GO:0006633~fatty acid biosynthetic process	8	1.82648	0.00321572	ELOVL1, FA2H, SCD, PRKAA1, ELOVL6, ACSL3, MGST2, SYK	333	79	13528	4.11389	0.99709	0.857227	5.32714
	GOTERM_BP_FAT	GO:0016053~organic acid biosynthetic process	10	2.28311	0.0142908	ELOVL1, SLC35D1, FA2H, SCD, PRKAA1, ELOVL6, ASL, ACSL3, MGST2, SYK	333	155	13528	2.62094	1	0.824433	21.7013
	GOTERM_BP_FAT	GO:0046394~carboxylic acid biosynthetic process	10	2.28311	0.0142908	ELOVL1, SLC35D1, FA2H, SCD, PRKAA1, ELOVL6, ASL, ACSL3, MGST2, SYK	333	155	13528	2.62094	1	0.824433	21.7013
	Annotation Cluster 2	Enrichment Score: 1.4745700861839988
	Category	Term	Count	%	PValue	Genes	List Total	Pop Hits	Pop Total	Fold Enrichment	Bonferroni	Benjamini	FDR
immune cell differentiation	GOTERM_BP_FAT	GO:0030217~T cell differentiation	6	1.36986	0.0214957	ATP7A, CHD7, BCL11B, SP3, CTNNB1, SYK	333	65	13528	3.74997	1	0.846804	30.8801
	GOTERM_BP_FAT	GO:0030098~lymphocyte differentiation	7	1.59817	0.0411679	ATP7A, CHD7, BCL11B, SP3, TPD52, CTNNB1, SYK	333	103	13528	2.7609	1	0.914447	51.0565
	GOTERM_BP_FAT	GO:0002521~leukocyte differentiation	8	1.82648	0.042597	ATP7A, CHD7, BCL11B, SP3, PPARG, TPD52, CTNNB1, SYK	333	131	13528	2.48089	1	0.915101	52.2817
	Annotation Cluster 3	Enrichment Score: 1.4465906810486266
	Category	Term	Count	%	PValue	Genes	List Total	Pop Hits	Pop Total	Fold Enrichment	Bonferroni	Benjamini	FDR
cytoskeleton organization	GOTERM_BP_FAT	GO:0008064~regulation of actin polymerization or depolymerization	6	1.36986	0.0167478	ARPC1B, LIMA1, ARPC5L, SCIN, CFL1, VILL	333	61	13528	3.99586	1	0.834905	24.9532
	GOTERM_BP_FAT	GO:0030832~regulation of actin filament length	6	1.36986	0.0190245	ARPC1B, LIMA1, ARPC5L, SCIN, CFL1, VILL	333	63	13528	3.86901	1	0.840039	27.8525
	GOTERM_BP_FAT	GO:0032956~regulation of actin cytoskeleton organization	6	1.36986	0.0677476	ARPC1B, LIMA1, ARPC5L, SCIN, CFL1, VILL	333	89	13528	2.73874	1	0.937017	69.6479
	GOTERM_BP_FAT	GO:0032970~regulation of actin filament-based process	6	1.36986	0.0757656	ARPC1B, LIMA1, ARPC5L, SCIN, CFL1, VILL	333	92	13528	2.64943	1	0.942554	73.7923
	Annotation Cluster 4	Enrichment Score: 1.4163165924999292
	Category	Term	Count	%	PValue	Genes	List Total	Pop Hits	Pop Total	Fold Enrichment	Bonferroni	Benjamini	FDR
protein amino acid glycosylation	GOTERM_BP_FAT	GO:0043413~biopolymer glycosylation	8	1.82648	0.0383428	GALNT3, GALNT7, FUT3, B3GNT3, TSPAN8, FUT2, GCNT1, ST6GALNAC1	333	128	13528	2.53904	1	0.913209	48.5469
	GOTERM_BP_FAT	GO:0070085~glycosylation	8	1.82648	0.0383428	GALNT3, GALNT7, FUT3, B3GNT3, TSPAN8, FUT2, GCNT1, ST6GALNAC1	333	128	13528	2.53904	1	0.913209	48.5469
	GOTERM_BP_FAT	GO:0006486~protein amino acid glycosylation	8	1.82648	0.0383428	GALNT3, GALNT7, FUT3, B3GNT3, TSPAN8, FUT2, GCNT1, ST6GALNAC1	333	128	13528	2.53904	1	0.913209	48.5469
	Annotation Cluster 5	Enrichment Score: 1.3815387858902346
	Category	Term	Count	%	PValue	Genes	List Total	Pop Hits	Pop Total	Fold Enrichment	Bonferroni	Benjamini	FDR
immune system development	GOTERM_BP_FAT	GO:0030097~hemopoiesis	12	2.73973	0.0315415	ATP7A, EBP, MAEA, CHD7, BCL11B, SP3, PPARG, SFXN1, CD164, TPD52, CTNNB1, SYK	333	236	13528	2.06566	1	0.902142	41.9995
	GOTERM_BP_FAT	GO:0002520~immune system development	13	2.96804	0.0401883	EBP, MAEA, UNG, PPARG, SFXN1, CD164, TPD52, CTNNB1, ATP7A, CHD7, SP3, BCL11B, SYK	333	276	13528	1.91348	1	0.916161	50.1996
	GOTERM_BP_FAT	GO:0048534~hemopoietic or lymphoid organ development	12	2.73973	0.056546	ATP7A, EBP, MAEA, CHD7, BCL11B, SP3, PPARG, SFXN1, CD164, TPD52, CTNNB1, SYK	333	260	13528	1.87498	1	0.933191	62.8164
	Annotation Cluster 6	Enrichment Score: 1.3208855542918494
	Category	Term	Count	%	PValue	Genes	List Total	Pop Hits	Pop Total	Fold Enrichment	Bonferroni	Benjamini	FDR
sterol biosynthetic process	GOTERM_BP_FAT	GO:0006695~cholesterol biosynthetic process	5	1.14155	0.00347486	EBP, HMGCS1, FDPS, PRKAA1, DHCR24	333	26	13528	7.81243	0.998184	0.793555	5.74458
	GOTERM_BP_FAT	GO:0016126~sterol biosynthetic process	5	1.14155	0.010241	EBP, HMGCS1, FDPS, PRKAA1, DHCR24	333	35	13528	5.80352	1	0.816696	16.0505
	GOTERM_BP_FAT	GO:0006694~steroid biosynthetic process	5	1.14155	0.156012	EBP, HMGCS1, FDPS, PRKAA1, DHCR24	333	85	13528	2.38968	1	0.964654	94.4024
	GOTERM_BP_FAT	GO:0008203~cholesterol metabolic process	5	1.14155	0.189734	EBP, HMGCS1, FDPS, PRKAA1, DHCR24	333	92	13528	2.20786	1	0.963734	97.2009
	GOTERM_BP_FAT	GO:0016125~sterol metabolic process	5	1.14155	0.236042	EBP, HMGCS1, FDPS, PRKAA1, DHCR24	333	101	13528	2.01112	1	0.975227	98.9705
	Annotation Cluster 7	Enrichment Score: 1.3047654055782827
	Category	Term	Count	%	PValue	Genes	List Total	Pop Hits	Pop Total	Fold Enrichment	Bonferroni	Benjamini	FDR
small molecule catabolic process	GOTERM_BP_FAT	GO:0019320~hexose catabolic process	6	1.36986	0.0270433	ALDOA, ADPGK, FUT3, HK2, PFKP, FUT2	333	69	13528	3.53258	1	0.895577	37.2468
	GOTERM_BP_FAT	GO:0046365~monosaccharide catabolic process	6	1.36986	0.0301289	ALDOA, ADPGK, FUT3, HK2, PFKP, FUT2	333	71	13528	3.43307	1	0.900836	40.5448
	GOTERM_BP_FAT	GO:0046164~alcohol catabolic process	6	1.36986	0.0488078	ALDOA, ADPGK, FUT3, HK2, PFKP, FUT2	333	81	13528	3.00923	1	0.925132	57.2786
	GOTERM_BP_FAT	GO:0044275~cellular carbohydrate catabolic process	6	1.36986	0.0578315	ALDOA, ADPGK, FUT3, HK2, PFKP, FUT2	333	85	13528	2.86762	1	0.923578	63.6682
	GOTERM_BP_FAT	GO:0016052~carbohydrate catabolic process	6	1.36986	0.130159	ALDOA, ADPGK, FUT3, HK2, PFKP, FUT2	333	109	13528	2.23622	1	0.960883	90.6521
	Annotation Cluster 8	Enrichment Score: 1.291953005776324
	Category	Term	Count	%	PValue	Genes	List Total	Pop Hits	Pop Total	Fold Enrichment	Bonferroni	Benjamini	FDR
nuclear transport	GOTERM_BP_FAT	GO:0051168~nuclear export	6	1.36986	0.0156806	XPO1, GSK3B, LOC728554, SMURF1, XPO7, HNRNPA1	333	60	13528	4.06246	1	0.833188	23.5567
	GOTERM_BP_FAT	GO:0006913~nucleocytoplasmic transport	8	1.82648	0.089809	XPO1, CBLB, GSK3B, LOC728554, SMURF1, XPO7, HNRNPA1, KPNA1	333	156	13528	2.08331	1	0.952476	79.7972
	GOTERM_BP_FAT	GO:0051169~nuclear transport	8	1.82648	0.0945057	XPO1, CBLB, GSK3B, LOC728554, SMURF1, XPO7, HNRNPA1, KPNA1	333	158	13528	2.05694	1	0.9502	81.4977
	Annotation Cluster 9	Enrichment Score: 1.0088477640244007
	Category	Term	Count	%	PValue	Genes	List Total	Pop Hits	Pop Total	Fold Enrichment	Bonferroni	Benjamini	FDR
phosphorylation	GOTERM_BP_FAT	GO:0016310~phosphorylation	28	6.39269	0.0576069	UQCRC2, ERBB3, HK2, PIP5K1B, TFG, MST4, UHMK1, NDUFS6, CAMK2D, PRKAA1, MASTL, CSK, SYK, FGD4, TWF1, CSNK1G1, LIMK2, STK24, TAOK3, PKN2, STK4, PRKD2, MAST4, GSK3B, CFL1, CDC42BPA, JAK1, MST1R	333	800	13528	1.42186	1	0.927464	63.5208
	GOTERM_BP_FAT	GO:0006468~protein amino acid phosphorylation	24	5.47945	0.062175	TWF1, CSNK1G1, LIMK2, ERBB3, STK24, TAOK3, PKN2, TFG, STK4, MST4, UHMK1, MAST4, PRKD2, GSK3B, CFL1, CDC42BPA, CAMK2D, JAK1, PRKAA1, MST1R, MASTL, CSK, SYK, FGD4	333	667	13528	1.46176	1	0.933231	66.4124
	GOTERM_BP_FAT	GO:0006796~phosphate metabolic process	30	6.84932	0.16042	UQCRC2, ERBB3, HK2, PIP5K1B, TFG, MST4, UHMK1, NDUFS6, CAMK2D, ACYP1, PRKAA1, MASTL, CSK, SYK, FGD4, TWF1, CSNK1G1, LIMK2, STK24, PTPRH, TAOK3, PKN2, STK4, PRKD2, MAST4, GSK3B, CFL1, CDC42BPA, JAK1, MST1R	333	973	13528	1.25256	1	0.964455	94.8791
	GOTERM_BP_FAT	GO:0006793~phosphorus metabolic process	30	6.84932	0.16042	UQCRC2, ERBB3, HK2, PIP5K1B, TFG, MST4, UHMK1, NDUFS6, CAMK2D, ACYP1, PRKAA1, MASTL, CSK, SYK, FGD4, TWF1, CSNK1G1, LIMK2, STK24, PTPRH, TAOK3, PKN2, STK4, PRKD2, MAST4, GSK3B, CFL1, CDC42BPA, JAK1, MST1R	333	973	13528	1.25256	1	0.964455	94.8791

## Sheet: C4
function clusters	Annotation Cluster 1	Enrichment Score: 48.372097509764615
	Category	Term	Count	%	PValue	Genes	List Total	Pop Hits	Pop Total	Fold Enrichment	Bonferroni	Benjamini	FDR
cell cycle	GOTERM_BP_FAT	GO:0022403~cell cycle phase	65	29.0179	2.99895e-50	KIF23, PRC1, DBF4, KNTC1, TTK, AURKA, AURKB, PTTG1, GTSE1, FAM83D, KIF2C, OIP5, CDCA2, H2AFX, CDCA5, CCNA2, ASPM, CDCA3, VCPIP1, CDC7, CDK1, KIF11, SGOL2, SGOL1, KIF15, TPX2, NUSAP1, ESPL1, PBK, UBE2C, RAD51, MAD2L1, SPAG5, ZWINT, BUB1B, DSCC1, BLM, NEK2, ANLN, CEP55, SPC25, NCAPG, BUB1, ZWILCH, HELLS, TRIP13, MKI67, CKAP5, DLGAP5, CENPF, CDC20, BIRC5, NDC80, CENPE, CDKN3, CDC25C, SMC2, CDC25A, S…	188	414	13528	11.2977	4.13256e-47	2.06628e-47	4.93173e-47
	GOTERM_BP_FAT	GO:0000279~M phase	60	26.7857	5.22687e-50	KIF23, PRC1, KNTC1, TTK, AURKA, PTTG1, AURKB, FAM83D, KIF2C, OIP5, CDCA2, H2AFX, CDCA5, CCNA2, ASPM, CDCA3, VCPIP1, CDK1, KIF11, SGOL2, SGOL1, KIF15, TPX2, NUSAP1, ESPL1, PBK, UBE2C, RAD51, MAD2L1, SPAG5, ZWINT, BUB1B, DSCC1, NEK2, ANLN, CEP55, SPC25, NCAPG, BUB1, ZWILCH, HELLS, TRIP13, MKI67, CKAP5, DLGAP5, CENPF, CDC20, BIRC5, NDC80, CENPE, CDC25C, SMC2, CDC25A, SMC4, CDC25B, CCNB1, CCNB2, CKS2…	188	329	13528	13.1229	7.20263e-47	2.40088e-47	8.59551e-47
	GOTERM_BP_FAT	GO:0022402~cell cycle process	72	32.1429	9.2615e-50	KIF23, PRC1, DBF4, KNTC1, TTK, AURKA, AURKB, PTTG1, GTSE1, FAM83D, KIF2C, OIP5, CDCA2, H2AFX, CDCA5, CCNA2, ASPM, CDCA3, VCPIP1, CDC7, CDK1, KIF11, SGOL2, SGOL1, KIF15, TPX2, NUSAP1, ESPL1, PBK, UBE2C, RAD51, SASS6, MAD2L1, SPAG5, ZWINT, BUB1B, DSCC1, BLM, NEK2, ANLN, CEP55, PSMA7, SPC25, NCAPG, CENPA, BUB1, ZWILCH, HELLS, TRIP13, MKI67, CKAP5, DLGAP5, CENPF, CDC20, BIRC5, NDC80, CENPE, RACGAP1, …	188	565	13528	9.1698	1.27624e-46	3.19059e-47	1.52304e-46
	GOTERM_BP_FAT	GO:0007067~mitosis	52	23.2143	5.3677e-49	KIF23, KNTC1, AURKA, PTTG1, AURKB, FAM83D, KIF2C, OIP5, CDCA2, CDCA5, CCNA2, ASPM, CDCA3, VCPIP1, CDK1, KIF11, KIF15, SGOL1, TPX2, NUSAP1, ESPL1, PBK, UBE2C, MAD2L1, SPAG5, ZWINT, BUB1B, DSCC1, NEK2, ANLN, CEP55, SPC25, NCAPG, BUB1, ZWILCH, HELLS, CKAP5, DLGAP5, CENPF, BIRC5, NDC80, CENPE, CDC20, CDC25C, SMC2, CDC25A, SMC4, CDC25B, CCNB1, CCNB2, SETD8, CIT	188	220	13528	17.0081	7.39669e-46	1.47934e-46	8.8271e-46
	GOTERM_BP_FAT	GO:0000280~nuclear division	52	23.2143	5.3677e-49	KIF23, KNTC1, AURKA, PTTG1, AURKB, FAM83D, KIF2C, OIP5, CDCA2, CDCA5, CCNA2, ASPM, CDCA3, VCPIP1, CDK1, KIF11, KIF15, SGOL1, TPX2, NUSAP1, ESPL1, PBK, UBE2C, MAD2L1, SPAG5, ZWINT, BUB1B, DSCC1, NEK2, ANLN, CEP55, SPC25, NCAPG, BUB1, ZWILCH, HELLS, CKAP5, DLGAP5, CENPF, BIRC5, NDC80, CENPE, CDC20, CDC25C, SMC2, CDC25A, SMC4, CDC25B, CCNB1, CCNB2, SETD8, CIT	188	220	13528	17.0081	7.39669e-46	1.47934e-46	8.8271e-46
	GOTERM_BP_FAT	GO:0000087~M phase of mitotic cell cycle	52	23.2143	1.45956e-48	KIF23, KNTC1, AURKA, PTTG1, AURKB, FAM83D, KIF2C, OIP5, CDCA2, CDCA5, CCNA2, ASPM, CDCA3, VCPIP1, CDK1, KIF11, KIF15, SGOL1, TPX2, NUSAP1, ESPL1, PBK, UBE2C, MAD2L1, SPAG5, ZWINT, BUB1B, DSCC1, NEK2, ANLN, CEP55, SPC25, NCAPG, BUB1, ZWILCH, HELLS, CKAP5, DLGAP5, CENPF, BIRC5, NDC80, CENPE, CDC20, CDC25C, SMC2, CDC25A, SMC4, CDC25B, CCNB1, CCNB2, SETD8, CIT	188	224	13528	16.7044	2.01127e-45	3.35211e-46	2.40022e-45
	GOTERM_BP_FAT	GO:0000278~mitotic cell cycle	61	27.2321	3.49165e-48	KIF23, PRC1, DBF4, KNTC1, TTK, AURKA, PTTG1, AURKB, GTSE1, FAM83D, KIF2C, OIP5, CDCA2, CDCA5, CCNA2, ASPM, CDCA3, VCPIP1, CDC7, CDK1, KIF11, SGOL1, KIF15, TPX2, NUSAP1, ESPL1, PBK, UBE2C, MAD2L1, SPAG5, ZWINT, BUB1B, DSCC1, BLM, NEK2, ANLN, CEP55, PSMA7, SPC25, NCAPG, CENPA, BUB1, ZWILCH, HELLS, CKAP5, DLGAP5, CENPF, CDC20, BIRC5, NDC80, CENPE, CDKN3, CDC25C, SMC2, CDC25A, SMC4, CDC25B, CCNB1, CC…	188	370	13528	11.8633	4.81149e-45	6.87356e-46	5.74196e-45
	GOTERM_BP_FAT	GO:0048285~organelle fission	52	23.2143	4.94879e-48	KIF23, KNTC1, AURKA, PTTG1, AURKB, FAM83D, KIF2C, OIP5, CDCA2, CDCA5, CCNA2, ASPM, CDCA3, VCPIP1, CDK1, KIF11, KIF15, SGOL1, TPX2, NUSAP1, ESPL1, PBK, UBE2C, MAD2L1, SPAG5, ZWINT, BUB1B, DSCC1, NEK2, ANLN, CEP55, SPC25, NCAPG, BUB1, ZWILCH, HELLS, CKAP5, DLGAP5, CENPF, BIRC5, NDC80, CENPE, CDC20, CDC25C, SMC2, CDC25A, SMC4, CDC25B, CCNB1, CCNB2, SETD8, CIT	188	229	13528	16.3397	6.81943e-45	8.52429e-46	8.13821e-45
	Annotation Cluster 2	Enrichment Score: 6.225724722714812
	Category	Term	Count	%	PValue	Genes	List Total	Pop Hits	Pop Total	Fold Enrichment	Bonferroni	Benjamini	FDR
regulation of mitosis	GOTERM_BP_FAT	GO:0007088~regulation of mitosis	10	4.46429	6.57905e-08	MAD2L1, NEK2, DLGAP5, BUB1, CENPF, NUSAP1, TTK, CENPE, ESPL1, CDC25C	188	56	13528	12.8495	9.06553e-05	3.12618e-06	0.000108191
	GOTERM_BP_FAT	GO:0051783~regulation of nuclear division	10	4.46429	6.57905e-08	MAD2L1, NEK2, DLGAP5, BUB1, CENPF, NUSAP1, TTK, CENPE, ESPL1, CDC25C	188	56	13528	12.8495	9.06553e-05	3.12618e-06	0.000108191
	GOTERM_BP_FAT	GO:0033043~regulation of organelle organization	13	5.80357	4.85846e-05	NEK2, DLGAP5, PSRC1, NUSAP1, TTK, CENPF, CENPE, ESPL1, CDC25C, BRCA1, PLK4, MAD2L1, BUB1	188	217	13528	4.31081	0.0647592	0.0012867	0.0798667
	Annotation Cluster 3	Enrichment Score: 5.056850627519645
	Category	Term	Count	%	PValue	Genes	List Total	Pop Hits	Pop Total	Fold Enrichment	Bonferroni	Benjamini	FDR
cell cycle	GOTERM_BP_FAT	GO:0007126~meiosis	10	4.46429	8.30099e-06	MKI67, NEK2, SGOL2, SGOL1, CKS2, H2AFX, ESPL1, TRIP13, CDC25B, RAD51	188	98	13528	7.3426	0.0113736	0.000272316	0.01365
	GOTERM_BP_FAT	GO:0051327~M phase of meiotic cell cycle	10	4.46429	8.30099e-06	MKI67, NEK2, SGOL2, SGOL1, CKS2, H2AFX, ESPL1, TRIP13, CDC25B, RAD51	188	98	13528	7.3426	0.0113736	0.000272316	0.01365
	GOTERM_BP_FAT	GO:0051321~meiotic cell cycle	10	4.46429	9.79915e-06	MKI67, NEK2, SGOL2, SGOL1, CKS2, H2AFX, ESPL1, TRIP13, CDC25B, RAD51	188	100	13528	7.19574	0.0134125	0.000313981	0.0161133
	Annotation Cluster 4	Enrichment Score: 4.594155816129311
	Category	Term	Count	%	PValue	Genes	List Total	Pop Hits	Pop Total	Fold Enrichment	Bonferroni	Benjamini	FDR
cell cycle	GOTERM_BP_FAT	GO:0031577~spindle checkpoint	6	2.67857	3.50278e-07	MAD2L1, BUB1, CENPF, TTK, BIRC5, CENPE	188	12	13528	35.9787	0.000482566	1.55703e-05	0.000576024
	GOTERM_BP_FAT	GO:0007094~mitotic cell cycle spindle assembly checkpoint	5	2.23214	1.0816e-05	MAD2L1, BUB1, CENPF, TTK, CENPE	188	11	13528	32.7079	0.014794	0.000338682	0.0177853
	GOTERM_BP_FAT	GO:0045841~negative regulation of mitotic metaphase/anaphase transition	5	2.23214	1.0816e-05	MAD2L1, BUB1, CENPF, TTK, CENPE	188	11	13528	32.7079	0.014794	0.000338682	0.0177853
	GOTERM_BP_FAT	GO:0051784~negative regulation of nuclear division	5	2.23214	1.60489e-05	MAD2L1, BUB1, CENPF, TTK, CENPE	188	12	13528	29.9823	0.0218728	0.000491336	0.0263889
	GOTERM_BP_FAT	GO:0045839~negative regulation of mitosis	5	2.23214	1.60489e-05	MAD2L1, BUB1, CENPF, TTK, CENPE	188	12	13528	29.9823	0.0218728	0.000491336	0.0263889
	GOTERM_BP_FAT	GO:0045786~negative regulation of cell cycle	5	2.23214	0.0258006	MAD2L1, BUB1, CENPF, TTK, CENPE	188	81	13528	4.44182	1	0.252098	34.9397
	Annotation Cluster 5	Enrichment Score: 4.328577046015036
	Category	Term	Count	%	PValue	Genes	List Total	Pop Hits	Pop Total	Fold Enrichment	Bonferroni	Benjamini	FDR
cell cycle	GOTERM_BP_FAT	GO:0030071~regulation of mitotic metaphase/anaphase transition	7	3.125	3.99654e-07	MAD2L1, DLGAP5, BUB1, CENPF, TTK, CENPE, ESPL1	188	22	13528	22.8956	0.000550572	1.72099e-05	0.000657222
	GOTERM_BP_FAT	GO:0010948~negative regulation of cell cycle process	7	3.125	9.16431e-07	MAD2L1, BUB1, CENPF, TTK, CENPE, ESPL1, BRCA1	188	25	13528	20.1481	0.00126205	3.82672e-05	0.00150705
	GOTERM_BP_FAT	GO:0010639~negative regulation of organelle organization	7	3.125	0.000944273	MAD2L1, BUB1, CENPF, TTK, CENPE, ESPL1, BRCA1	188	82	13528	6.14271	0.727964	0.0169834	1.54157
	GOTERM_BP_FAT	GO:0051129~negative regulation of cellular component organization	7	3.125	0.014022	MAD2L1, BUB1, CENPF, TTK, CENPE, ESPL1, BRCA1	188	142	13528	3.5472	1	0.164877	20.723
	Annotation Cluster 6	Enrichment Score: 4.187169934504133
	Category	Term	Count	%	PValue	Genes	List Total	Pop Hits	Pop Total	Fold Enrichment	Bonferroni	Benjamini	FDR
DNA duplex unwinding	GOTERM_BP_FAT	GO:0006268~DNA unwinding during replication	5	2.23214	3.17579e-05	HMGB2, MCM7, MCM2, MCM4, RAD51	188	14	13528	25.6991	0.0428193	0.000874879	0.0522126
	GOTERM_BP_FAT	GO:0032508~DNA duplex unwinding	5	2.23214	9.29649e-05	HMGB2, MCM7, MCM2, MCM4, RAD51	188	18	13528	19.9882	0.120245	0.00224505	0.15277
	GOTERM_BP_FAT	GO:0032392~DNA geometric change	5	2.23214	9.29649e-05	HMGB2, MCM7, MCM2, MCM4, RAD51	188	18	13528	19.9882	0.120245	0.00224505	0.15277
	Annotation Cluster 7	Enrichment Score: 4.118612189560767
	Category	Term	Count	%	PValue	Genes	List Total	Pop Hits	Pop Total	Fold Enrichment	Bonferroni	Benjamini	FDR
DNA damage checkpoint	GOTERM_BP_FAT	GO:0000077~DNA damage checkpoint	7	3.125	4.87709e-05	CDK1, BLM, BRIP1, H2AFX, CCNA2, GTSE1, BRCA1	188	48	13528	10.4938	0.0649992	0.00126727	0.0801728
	GOTERM_BP_FAT	GO:0031570~DNA integrity checkpoint	7	3.125	7.72911e-05	CDK1, BLM, BRIP1, H2AFX, CCNA2, GTSE1, BRCA1	188	52	13528	9.68658	0.101035	0.00190018	0.127028
	GOTERM_BP_FAT	GO:0042770~DNA damage response, signal transduction	8	3.57143	0.000116916	CDK1, BLM, BRIP1, H2AFX, DYRK2, CCNA2, GTSE1, BRCA1	188	80	13528	7.19574	0.14881	0.00268172	0.192093
	Annotation Cluster 8	Enrichment Score: 4.012196366080514
	Category	Term	Count	%	PValue	Genes	List Total	Pop Hits	Pop Total	Fold Enrichment	Bonferroni	Benjamini	FDR
centrosome organization	GOTERM_BP_FAT	GO:0051297~centrosome organization	6	2.67857	7.11482e-05	SASS6, KIF11, NEK2, CKAP5, CENPJ, BRCA1	188	32	13528	13.492	0.0933926	0.00178106	0.116938
	GOTERM_BP_FAT	GO:0031023~microtubule organizing center organization	6	2.67857	0.000110909	SASS6, KIF11, NEK2, CKAP5, CENPJ, BRCA1	188	35	13528	12.3356	0.141733	0.00263171	0.182231
	GOTERM_BP_FAT	GO:0007098~centrosome cycle	5	2.23214	0.000116488	SASS6, KIF11, NEK2, CENPJ, BRCA1	188	19	13528	18.9362	0.148308	0.00271715	0.191391
	Annotation Cluster 9	Enrichment Score: 3.6443877833782734
	Category	Term	Count	%	PValue	Genes	List Total	Pop Hits	Pop Total	Fold Enrichment	Bonferroni	Benjamini	FDR
spindle localization	GOTERM_BP_FAT	GO:0040001~establishment of mitotic spindle localization	4	1.78571	0.000138315	CENPA, NUSAP1, NDC80, ESPL1	188	8	13528	35.9787	0.173546	0.00311989	0.227213
	GOTERM_BP_FAT	GO:0051293~establishment of spindle localization	4	1.78571	0.000290392	CENPA, NUSAP1, NDC80, ESPL1	188	10	13528	28.783	0.329826	0.00613828	0.476475
	GOTERM_BP_FAT	GO:0051653~spindle localization	4	1.78571	0.000290392	CENPA, NUSAP1, NDC80, ESPL1	188	10	13528	28.783	0.329826	0.00613828	0.476475
	Annotation Cluster 10	Enrichment Score: 3.4960692694683804
	Category	Term	Count	%	PValue	Genes	List Total	Pop Hits	Pop Total	Fold Enrichment	Bonferroni	Benjamini	FDR
nucleosome organization	GOTERM_BP_FAT	GO:0065004~protein-DNA complex assembly	10	4.46429	4.49203e-06	HMGB2, HJURP, HIST2H2BE, CENPA, CENPF, H2AFX, CENPE, MCM2, HELLS, HIST1H3H	188	91	13528	7.90741	0.00617092	0.000158706	0.00738682
	GOTERM_BP_FAT	GO:0031497~chromatin assembly	8	3.57143	0.000198297	HMGB2, HJURP, HIST2H2BE, CENPA, H2AFX, MCM2, HELLS, HIST1H3H	188	87	13528	6.61678	0.23912	0.00432838	0.325597
	GOTERM_BP_FAT	GO:0006334~nucleosome assembly	7	3.125	0.00107152	HMGB2, HJURP, HIST2H2BE, CENPA, H2AFX, MCM2, HIST1H3H	188	84	13528	5.99645	0.771758	0.0190035	1.7476
	GOTERM_BP_FAT	GO:0034728~nucleosome organization	7	3.125	0.00181428	HMGB2, HJURP, HIST2H2BE, CENPA, H2AFX, MCM2, HIST1H3H	188	93	13528	5.41615	0.918108	0.0300556	2.94212
	GOTERM_BP_FAT	GO:0006333~chromatin assembly or disassembly	8	3.57143	0.00191068	HMGB2, HJURP, HIST2H2BE, CENPA, H2AFX, MCM2, HELLS, HIST1H3H	188	127	13528	4.53275	0.928313	0.0312535	3.09615
	Annotation Cluster 11	Enrichment Score: 3.2284879096269186
	Category	Term	Count	%	PValue	Genes	List Total	Pop Hits	Pop Total	Fold Enrichment	Bonferroni	Benjamini	FDR
DNA recombination	GOTERM_BP_FAT	GO:0000724~double-strand break repair via homologous recombination	5	2.23214	0.000116488	RAD51AP1, BLM, H2AFX, BRCA1, RAD51	188	19	13528	18.9362	0.148308	0.00271715	0.191391
	GOTERM_BP_FAT	GO:0000725~recombinational repair	5	2.23214	0.000116488	RAD51AP1, BLM, H2AFX, BRCA1, RAD51	188	19	13528	18.9362	0.148308	0.00271715	0.191391
	GOTERM_BP_FAT	GO:0006310~DNA recombination	6	2.67857	0.0152046	RAD51AP1, BLM, H2AFX, BRCA1, TRIP13, RAD51	188	105	13528	4.11185	1	0.171805	22.2722
	Annotation Cluster 12	Enrichment Score: 2.8062938027946007
	Category	Term	Count	%	PValue	Genes	List Total	Pop Hits	Pop Total	Fold Enrichment	Bonferroni	Benjamini	FDR
protein ubiquitination	GOTERM_BP_FAT	GO:0031145~anaphase-promoting complex-dependent proteasomal ubiquitin-dependent protein catabolic process	7	3.125	0.000270311	CCNB1, CDK1, MAD2L1, BUB1B, CDC20, PSMA7, UBE2C	188	65	13528	7.74926	0.311017	0.00580401	0.443596
	GOTERM_BP_FAT	GO:0051439~regulation of ubiquitin-protein ligase activity during mitotic cell cycle	7	3.125	0.000437709	CCNB1, CDK1, MAD2L1, BUB1B, CDC20, PSMA7, UBE2C	188	71	13528	7.0944	0.452994	0.00909918	0.717377
	GOTERM_BP_FAT	GO:0031396~regulation of protein ubiquitination	8	3.57143	0.000467342	CCNB1, CDK1, MAD2L1, BUB1B, CDC20, PSMA7, UBE2C, BRCA1	188	100	13528	5.7566	0.47489	0.00942804	0.765769
	GOTERM_BP_FAT	GO:0051438~regulation of ubiquitin-protein ligase activity	7	3.125	0.000724872	CCNB1, CDK1, MAD2L1, BUB1B, CDC20, PSMA7, UBE2C	188	78	13528	6.45772	0.631839	0.0135949	1.18539
	GOTERM_BP_FAT	GO:0051340~regulation of ligase activity	7	3.125	0.000885183	CCNB1, CDK1, MAD2L1, BUB1B, CDC20, PSMA7, UBE2C	188	81	13528	6.21854	0.704865	0.0161393	1.44576
	GOTERM_BP_FAT	GO:0010498~proteasomal protein catabolic process	7	3.125	0.00289453	CCNB1, CDK1, MAD2L1, BUB1B, CDC20, PSMA7, UBE2C	188	102	13528	4.93826	0.981582	0.0448751	4.65508
	GOTERM_BP_FAT	GO:0043161~proteasomal ubiquitin-dependent protein catabolic process	7	3.125	0.00289453	CCNB1, CDK1, MAD2L1, BUB1B, CDC20, PSMA7, UBE2C	188	102	13528	4.93826	0.981582	0.0448751	4.65508
	GOTERM_BP_FAT	GO:0006511~ubiquitin-dependent protein catabolic process	7	3.125	0.119266	CCNB1, CDK1, MAD2L1, BUB1B, CDC20, PSMA7, UBE2C	188	242	13528	2.08141	1	0.679027	87.6125
	Annotation Cluster 13	Enrichment Score: 2.4979721515161177
	Category	Term	Count	%	PValue	Genes	List Total	Pop Hits	Pop Total	Fold Enrichment	Bonferroni	Benjamini	FDR
cell cycle	GOTERM_BP_FAT	GO:0045842~positive regulation of mitotic metaphase/anaphase transition	3	1.33929	0.000565018	DLGAP5, CENPE, ESPL1	188	3	13528	71.9574	0.541051	0.0109093	0.925121
	GOTERM_BP_FAT	GO:0051785~positive regulation of nuclear division	4	1.78571	0.00477885	DLGAP5, NUSAP1, CENPE, ESPL1	188	25	13528	11.5132	0.998641	0.0707197	7.57529
	GOTERM_BP_FAT	GO:0045840~positive regulation of mitosis	4	1.78571	0.00477885	DLGAP5, NUSAP1, CENPE, ESPL1	188	25	13528	11.5132	0.998641	0.0707197	7.57529
	GOTERM_BP_FAT	GO:0045787~positive regulation of cell cycle	5	2.23214	0.00789591	DLGAP5, NUSAP1, BIRC5, CENPE, ESPL1	188	57	13528	6.31206	0.999982	0.103483	12.2223
	Annotation Cluster 14	Enrichment Score: 2.333717023654554
	Category	Term	Count	%	PValue	Genes	List Total	Pop Hits	Pop Total	Fold Enrichment	Bonferroni	Benjamini	FDR
protein modification process	GOTERM_BP_FAT	GO:0031401~positive regulation of protein modification process	10	4.46429	0.00116954	PRKCA, CCNB1, CDK1, LYN, TTK, PPP2R4, CDC20, PSMA7, UBE2C, BRCA1	188	187	13528	3.84799	0.800626	0.0204618	1.90602
	GOTERM_BP_FAT	GO:0051247~positive regulation of protein metabolic process	11	4.91071	0.00204703	PRKCA, CCNB1, CDK1, LYN, TTK, PPP2R4, CDC20, PSMA7, UBE2C, BRCA1, BARD1	188	243	13528	3.25733	0.940614	0.0330568	3.31362
	GOTERM_BP_FAT	GO:0031399~regulation of protein modification process	12	5.35714	0.00268985	PRKCA, CCNB1, CDK1, MAD2L1, LYN, BUB1B, TTK, PPP2R4, CDC20, PSMA7, UBE2C, BRCA1	188	295	13528	2.92708	0.975562	0.0427264	4.33272
	GOTERM_BP_FAT	GO:0032270~positive regulation of cellular protein metabolic process	10	4.46429	0.00513037	PRKCA, CCNB1, CDK1, LYN, TTK, PPP2R4, CDC20, PSMA7, UBE2C, BRCA1	188	233	13528	3.0883	0.999165	0.0733815	8.11067
	GOTERM_BP_FAT	GO:0032268~regulation of cellular protein metabolic process	12	5.35714	0.0649227	PRKCA, CCNB1, CDK1, MAD2L1, LYN, BUB1B, TTK, PPP2R4, CDC20, PSMA7, UBE2C, BRCA1	188	474	13528	1.82171	1	0.483517	66.8417
	Annotation Cluster 15	Enrichment Score: 2.0476838258745453
	Category	Term	Count	%	PValue	Genes	List Total	Pop Hits	Pop Total	Fold Enrichment	Bonferroni	Benjamini	FDR
phosphate metabolic process	GOTERM_BP_FAT	GO:0019220~regulation of phosphate metabolic process	15	6.69643	0.00749583	PRKCA, DGKQ, BLM, LYN, TTK, CENPE, CDC25C, CDKN3, CDC25A, CDC25B, CCNE2, MCM7, CKS2, PPP2R4, BARD1	188	485	13528	2.22549	0.999969	0.0994314	11.6383
	GOTERM_BP_FAT	GO:0051174~regulation of phosphorus metabolic process	15	6.69643	0.00749583	PRKCA, DGKQ, BLM, LYN, TTK, CENPE, CDC25C, CDKN3, CDC25A, CDC25B, CCNE2, MCM7, CKS2, PPP2R4, BARD1	188	485	13528	2.22549	0.999969	0.0994314	11.6383
	GOTERM_BP_FAT	GO:0042325~regulation of phosphorylation	14	6.25	0.0128029	PRKCA, DGKQ, BLM, LYN, TTK, CENPE, CDC25C, CDKN3, CDC25A, CDC25B, CCNE2, MCM7, CKS2, BARD1	188	466	13528	2.16181	1	0.158351	19.0956
	Annotation Cluster 16	Enrichment Score: 1.9751551568437127
	Category	Term	Count	%	PValue	Genes	List Total	Pop Hits	Pop Total	Fold Enrichment	Bonferroni	Benjamini	FDR
DNA repair	GOTERM_BP_FAT	GO:0006297~nucleotide-excision repair, DNA gap filling	4	1.78571	0.00153226	RFC5, RFC3, POLE2, RPA3	188	17	13528	16.9312	0.879135	0.0260677	2.49019
	GOTERM_BP_FAT	GO:0006289~nucleotide-excision repair	5	2.23214	0.00696408	RFC5, RFC3, POLE2, NEIL3, RPA3	188	55	13528	6.54159	0.999934	0.0945101	10.8566
	KEGG_PATHWAY	hsa03420:Nucleotide excision repair	4	1.78571	0.0264882	RFC5, RFC3, POLE2, RPA3	76	44	5085	6.08254	0.892274	0.310205	24.9847
	KEGG_PATHWAY	hsa03430:Mismatch repair	3	1.33929	0.0444763	RFC5, RFC3, RPA3	76	23	5085	8.72712	0.977089	0.416931	38.5655
	Annotation Cluster 17	Enrichment Score: 1.8962613244650106
	Category	Term	Count	%	PValue	Genes	List Total	Pop Hits	Pop Total	Fold Enrichment	Bonferroni	Benjamini	FDR
protein ubiquitination	GOTERM_BP_FAT	GO:0031398~positive regulation of protein ubiquitination	6	2.67857	0.00612127	CCNB1, CDK1, CDC20, PSMA7, UBE2C, BRCA1	188	84	13528	5.13982	0.999788	0.0852125	9.60423
	GOTERM_BP_FAT	GO:0051437~positive regulation of ubiquitin-protein ligase activity during mitotic cell cycle	5	2.23214	0.0144854	CCNB1, CDK1, CDC20, PSMA7, UBE2C	188	68	13528	5.29099	1	0.168453	21.3335
	GOTERM_BP_FAT	GO:0051443~positive regulation of ubiquitin-protein ligase activity	5	2.23214	0.0159674	CCNB1, CDK1, CDC20, PSMA7, UBE2C	188	70	13528	5.13982	1	0.178225	23.2564
	GOTERM_BP_FAT	GO:0051351~positive regulation of ligase activity	5	2.23214	0.0183632	CCNB1, CDK1, CDC20, PSMA7, UBE2C	188	73	13528	4.92859	1	0.197618	26.272
	Annotation Cluster 18	Enrichment Score: 1.8358969778965435
	Category	Term	Count	%	PValue	Genes	List Total	Pop Hits	Pop Total	Fold Enrichment	Bonferroni	Benjamini	FDR
protein ubiquitination	GOTERM_BP_FAT	GO:0051436~negative regulation of ubiquitin-protein ligase activity during mitotic cell cycle	5	2.23214	0.0124312	MAD2L1, BUB1B, CDC20, PSMA7, UBE2C	188	65	13528	5.53519	1	0.155488	18.5932
	GOTERM_BP_FAT	GO:0051352~negative regulation of ligase activity	5	2.23214	0.0137784	MAD2L1, BUB1B, CDC20, PSMA7, UBE2C	188	67	13528	5.36996	1	0.163626	20.4003
	GOTERM_BP_FAT	GO:0051444~negative regulation of ubiquitin-protein ligase activity	5	2.23214	0.0137784	MAD2L1, BUB1B, CDC20, PSMA7, UBE2C	188	67	13528	5.36996	1	0.163626	20.4003
	GOTERM_BP_FAT	GO:0031397~negative regulation of protein ubiquitination	5	2.23214	0.0192088	MAD2L1, BUB1B, CDC20, PSMA7, UBE2C	188	74	13528	4.86199	1	0.204224	27.3094
	Annotation Cluster 19	Enrichment Score: 1.6907216798246385
	Category	Term	Count	%	PValue	Genes	List Total	Pop Hits	Pop Total	Fold Enrichment	Bonferroni	Benjamini	FDR
nucleotide biosynthetic process	GOTERM_BP_FAT	GO:0009165~nucleotide biosynthetic process	8	3.57143	0.014843	ATP5J2, ATP2C2, DHFR, ATP1B3, ADM, ATP9A, RRM2, DTYMK	188	186	13528	3.09494	1	0.170835	21.8016
	GOTERM_BP_FAT	GO:0034404~nucleobase, nucleoside and nucleotide biosynthetic process	8	3.57143	0.0178276	ATP5J2, ATP2C2, DHFR, ATP1B3, ADM, ATP9A, RRM2, DTYMK	188	193	13528	2.98269	1	0.193901	25.6077
	GOTERM_BP_FAT	GO:0034654~nucleobase, nucleoside, nucleotide and nucleic acid biosynthetic process	8	3.57143	0.0178276	ATP5J2, ATP2C2, DHFR, ATP1B3, ADM, ATP9A, RRM2, DTYMK	188	193	13528	2.98269	1	0.193901	25.6077
	GOTERM_BP_FAT	GO:0044271~nitrogen compound biosynthetic process	10	4.46429	0.0365935	ATP5J2, ATP2C2, DHFR, ASS1, ATP1B3, ADM, ATP9A, RRM2, DTYMK, AGMAT	188	325	13528	2.21408	1	0.330578	45.831
	Annotation Cluster 20	Enrichment Score: 1.5347991670351935
	Category	Term	Count	%	PValue	Genes	List Total	Pop Hits	Pop Total	Fold Enrichment	Bonferroni	Benjamini	FDR
macromolecule catabolic process	GOTERM_BP_FAT	GO:0043632~modification-dependent macromolecule catabolic process	16	7.14286	0.0135193	CDK1, DTL, CDC20, TMEM189, UBE2C, PSMA7, BRCA1, CCNB1, UHRF1, MAD2L1, BUB1B, RAD18, UBE2T, VCPIP1, BARD1, CDCA3	188	574	13528	2.00578	1	0.162179	20.0557
	GOTERM_BP_FAT	GO:0019941~modification-dependent protein catabolic process	16	7.14286	0.0135193	CDK1, DTL, CDC20, TMEM189, UBE2C, PSMA7, BRCA1, CCNB1, UHRF1, MAD2L1, BUB1B, RAD18, UBE2T, VCPIP1, BARD1, CDCA3	188	574	13528	2.00578	1	0.162179	20.0557
	GOTERM_BP_FAT	GO:0051603~proteolysis involved in cellular protein catabolic process	16	7.14286	0.0194154	CDK1, DTL, CDC20, TMEM189, UBE2C, PSMA7, BRCA1, CCNB1, UHRF1, MAD2L1, BUB1B, RAD18, UBE2T, VCPIP1, BARD1, CDCA3	188	600	13528	1.91887	1	0.204642	27.5609
	GOTERM_BP_FAT	GO:0044257~cellular protein catabolic process	16	7.14286	0.0202055	CDK1, DTL, CDC20, TMEM189, UBE2C, PSMA7, BRCA1, CCNB1, UHRF1, MAD2L1, BUB1B, RAD18, UBE2T, VCPIP1, BARD1, CDCA3	188	603	13528	1.90932	1	0.208957	28.5147
	GOTERM_BP_FAT	GO:0044265~cellular macromolecule catabolic process	18	8.03571	0.0231751	CDK1, DTL, CDC20, TMEM189, UBE2C, PSMA7, BRCA1, RPA3, CCNB1, UHRF1, MAD2L1, BUB1B, RAD18, UBE2T, FEN1, CDCA3, BARD1, VCPIP1	188	725	13528	1.78653	1	0.234353	31.9955
	GOTERM_BP_FAT	GO:0030163~protein catabolic process	16	7.14286	0.0257915	CDK1, DTL, CDC20, TMEM189, UBE2C, PSMA7, BRCA1, CCNB1, UHRF1, MAD2L1, BUB1B, RAD18, UBE2T, VCPIP1, BARD1, CDCA3	188	622	13528	1.851	1	0.253784	34.9298
	GOTERM_BP_FAT	GO:0009057~macromolecule catabolic process	18	8.03571	0.0425751	CDK1, DTL, CDC20, TMEM189, UBE2C, PSMA7, BRCA1, RPA3, CCNB1, UHRF1, MAD2L1, BUB1B, RAD18, UBE2T, FEN1, CDCA3, BARD1, VCPIP1	188	781	13528	1.65843	1	0.36724	51.1044
	GOTERM_BP_FAT	GO:0006508~proteolysis	18	8.03571	0.288686	CDK1, DTL, C4BPB, CDC20, ESPL1, TMEM189, UBE2C, PSMA7, BRCA1, CCNB1, UHRF1, MAD2L1, BUB1B, RAD18, UBE2T, CDCA3, VCPIP1, BARD1	188	1054	13528	1.22887	1	0.916559	99.6309
	Annotation Cluster 21	Enrichment Score: 1.4085059771672386
	Category	Term	Count	%	PValue	Genes	List Total	Pop Hits	Pop Total	Fold Enrichment	Bonferroni	Benjamini	FDR
protein metabolic process	GOTERM_BP_FAT	GO:0031400~negative regulation of protein modification process	7	3.125	0.0061571	PRKCA, MAD2L1, BUB1B, PPP2R4, CDC20, PSMA7, UBE2C	188	119	13528	4.23279	0.999799	0.0848372	9.65781
	GOTERM_BP_FAT	GO:0032269~negative regulation of cellular protein metabolic process	7	3.125	0.038997	PRKCA, MAD2L1, BUB1B, PPP2R4, CDC20, PSMA7, UBE2C	188	180	13528	2.79835	1	0.344033	48.0111
	GOTERM_BP_FAT	GO:0051248~negative regulation of protein metabolic process	7	3.125	0.0455359	PRKCA, MAD2L1, BUB1B, PPP2R4, CDC20, PSMA7, UBE2C	188	187	13528	2.69359	1	0.385244	53.5324
	GOTERM_BP_FAT	GO:0043086~negative regulation of catalytic activity	8	3.57143	0.0896753	PRKCA, MAD2L1, BUB1B, BIRC5, PPP2R4, CDC20, PSMA7, UBE2C	188	277	13528	2.07819	1	0.580594	78.67
	GOTERM_BP_FAT	GO:0044092~negative regulation of molecular function	9	4.01786	0.0924774	PRKCA, KDM1A, MAD2L1, BUB1B, BIRC5, PPP2R4, CDC20, PSMA7, UBE2C	188	334	13528	1.93897	1	0.589937	79.7245
	Annotation Cluster 22	Enrichment Score: 1.217127145502967
	Category	Term	Count	%	PValue	Genes	List Total	Pop Hits	Pop Total	Fold Enrichment	Bonferroni	Benjamini	FDR
kinase activity	GOTERM_BP_FAT	GO:0045859~regulation of protein kinase activity	10	4.46429	0.0504902	PRKCA, CCNE2, DGKQ, BLM, CKS2, CENPE, CDKN3, CDC25C, CDC25A, CDC25B	188	345	13528	2.08572	1	0.408416	57.3438
	GOTERM_BP_FAT	GO:0043549~regulation of kinase activity	10	4.46429	0.0600908	PRKCA, CCNE2, DGKQ, BLM, CKS2, CENPE, CDKN3, CDC25C, CDC25A, CDC25B	188	357	13528	2.01561	1	0.459018	63.9087
	GOTERM_BP_FAT	GO:0051338~regulation of transferase activity	10	4.46429	0.0735535	PRKCA, CCNE2, DGKQ, BLM, CKS2, CENPE, CDKN3, CDC25C, CDC25A, CDC25B	188	372	13528	1.93434	1	0.52355	71.5314
	Annotation Cluster 23	Enrichment Score: 1.161899555817272
	Category	Term	Count	%	PValue	Genes	List Total	Pop Hits	Pop Total	Fold Enrichment	Bonferroni	Benjamini	FDR
cytoskeleton organization	GOTERM_BP_FAT	GO:0070507~regulation of microtubule cytoskeleton organization	4	1.78571	0.0201054	PLK4, PSRC1, CENPE, BRCA1	188	42	13528	6.85309	1	0.209579	28.3946
	GOTERM_BP_FAT	GO:0032886~regulation of microtubule-based process	4	1.78571	0.0300921	PLK4, PSRC1, CENPE, BRCA1	188	49	13528	5.87408	1	0.285969	39.4959
	GOTERM_BP_FAT	GO:0051495~positive regulation of cytoskeleton organization	3	1.33929	0.128103	PLK4, PSRC1, CENPE	188	45	13528	4.79716	1	0.697472	89.5055
	GOTERM_BP_FAT	GO:0051493~regulation of cytoskeleton organization	4	1.78571	0.290453	PLK4, PSRC1, CENPE, BRCA1	188	136	13528	2.1164	1	0.915884	99.6457
	Annotation Cluster 24	Enrichment Score: 1.1600226512399536
	Category	Term	Count	%	PValue	Genes	List Total	Pop Hits	Pop Total	Fold Enrichment	Bonferroni	Benjamini	FDR
phosphorylation	GOTERM_BP_FAT	GO:0006796~phosphate metabolic process	21	9.375	0.0482821	PRKCA, CDC7, CDK1, LYN, NDUFA9, NEK2, TTK, AURKA, AURKB, PBK, CDC25C, CDKN3, CDC25A, CDC25B, PLK4, VRK1, BUB1, DYRK2, GK, CIT, MELK	188	973	13528	1.55304	1	0.398843	55.6829
	GOTERM_BP_FAT	GO:0006793~phosphorus metabolic process	21	9.375	0.0482821	PRKCA, CDC7, CDK1, LYN, NDUFA9, NEK2, TTK, AURKA, AURKB, PBK, CDC25C, CDKN3, CDC25A, CDC25B, PLK4, VRK1, BUB1, DYRK2, GK, CIT, MELK	188	973	13528	1.55304	1	0.398843	55.6829
	GOTERM_BP_FAT	GO:0016310~phosphorylation	16	7.14286	0.142023	PRKCA, CDC7, CDK1, LYN, NDUFA9, NEK2, TTK, AURKA, PBK, AURKB, PLK4, VRK1, BUB1, DYRK2, CIT, MELK	188	800	13528	1.43915	1	0.732664	91.946
	Annotation Cluster 25	Enrichment Score: 1.1350827412888251
	Category	Term	Count	%	PValue	Genes	List Total	Pop Hits	Pop Total	Fold Enrichment	Bonferroni	Benjamini	FDR
developmental maturation	GOTERM_BP_FAT	GO:0001556~oocyte maturation	3	1.33929	0.0134121	CCNB1, TRIP13, CDC25B	188	13	13528	16.6056	1	0.162395	19.9126
	GOTERM_BP_FAT	GO:0048599~oocyte development	3	1.33929	0.0335978	CCNB1, TRIP13, CDC25B	188	21	13528	10.2796	1	0.311856	42.9935
	GOTERM_BP_FAT	GO:0009994~oocyte differentiation	3	1.33929	0.0366278	CCNB1, TRIP13, CDC25B	188	22	13528	9.81238	1	0.328747	45.8627
	GOTERM_BP_FAT	GO:0048469~cell maturation	4	1.78571	0.0853806	CCNB1, AGRN, TRIP13, CDC25B	188	75	13528	3.83773	1	0.569302	76.9535
	GOTERM_BP_FAT	GO:0048477~oogenesis	3	1.33929	0.0967128	CCNB1, TRIP13, CDC25B	188	38	13528	5.68085	1	0.604748	81.2257
	GOTERM_BP_FAT	GO:0021700~developmental maturation	4	1.78571	0.163986	CCNB1, AGRN, TRIP13, CDC25B	188	101	13528	2.8498	1	0.773911	94.7421
	GOTERM_BP_FAT	GO:0007281~germ cell development	4	1.78571	0.163986	CCNB1, CASC5, TRIP13, CDC25B	188	101	13528	2.8498	1	0.773911	94.7421
	GOTERM_BP_FAT	GO:0007292~female gamete generation	3	1.33929	0.226602	CCNB1, TRIP13, CDC25B	188	65	13528	3.32111	1	0.86015	98.5385

## Sheet: C5
function clusters	Annotation Cluster 1	Enrichment Score: 2.488852397821916
	Category	Term	Count	%	PValue	Genes	List Total	Pop Hits	Pop Total	Fold Enrichment	Bonferroni	Benjamini	FDR
cell differentiation	GOTERM_BP_FAT	GO:0045599~negative regulation of fat cell differentiation	3	3.2967	0.000514396	CCDC85B, TGFB1I1, WWTR1	69	7	13528	84.0248	0.367083	0.367083	0.797547
	GOTERM_BP_FAT	GO:0045598~regulation of fat cell differentiation	3	3.2967	0.00285473	CCDC85B, TGFB1I1, WWTR1	69	16	13528	36.7609	0.92125	0.398481	4.35156
	GOTERM_BP_FAT	GO:0045596~negative regulation of cell differentiation	5	5.49451	0.0232584	NOTCH1, CCDC85B, ID4, TGFB1I1, WWTR1	69	216	13528	4.53838	1	0.729521	30.6663
	Annotation Cluster 2	Enrichment Score: 2.095555358965003
	Category	Term	Count	%	PValue	Genes	List Total	Pop Hits	Pop Total	Fold Enrichment	Bonferroni	Benjamini	FDR
skeletal system development	GOTERM_BP_FAT	GO:0001501~skeletal system development	8	8.79121	0.00107314	KLF10, JAG2, GNAS, POSTN, NPR3, WWTR1, GPNMB, MYC	69	319	13528	4.91681	0.615008	0.272526	1.6571
	GOTERM_BP_FAT	GO:0001503~ossification	4	4.3956	0.0201041	KLF10, GNAS, WWTR1, GPNMB	69	115	13528	6.81941	1	0.835602	27.0985
	GOTERM_BP_FAT	GO:0060348~bone development	4	4.3956	0.0239549	KLF10, GNAS, WWTR1, GPNMB	69	123	13528	6.37587	1	0.718591	31.4317
	Annotation Cluster 3	Enrichment Score: 1.8175709935364828
	Category	Term	Count	%	PValue	Genes	List Total	Pop Hits	Pop Total	Fold Enrichment	Bonferroni	Benjamini	FDR
cell communication	GOTERM_BP_FAT	GO:0009968~negative regulation of signal transduction	7	7.69231	0.000835943	HHEX, STMN3, IL6ST, FSTL3, TGFB1I1, GRB14, DDIT4	69	221	13528	6.20998	0.524536	0.310461	1.29306
	GOTERM_BP_FAT	GO:0010648~negative regulation of cell communication	7	7.69231	0.00151324	HHEX, STMN3, IL6ST, FSTL3, TGFB1I1, GRB14, DDIT4	69	248	13528	5.53389	0.739796	0.285786	2.32923
	GOTERM_BP_FAT	GO:0009967~positive regulation of signal transduction	4	4.3956	0.185075	HHEX, IL6ST, TGM2, TGFB1I1	69	295	13528	2.65841	1	0.858629	95.8624
	GOTERM_BP_FAT	GO:0010647~positive regulation of cell communication	4	4.3956	0.229236	HHEX, IL6ST, TGM2, TGFB1I1	69	329	13528	2.38368	1	0.896619	98.2614
	Annotation Cluster 4	Enrichment Score: 1.6545582603735969
	Category	Term	Count	%	PValue	Genes	List Total	Pop Hits	Pop Total	Fold Enrichment	Bonferroni	Benjamini	FDR
	KEGG_PATHWAY	hsa04270:Vascular smooth muscle contraction	5	5.49451	0.00264712	KCNMB4, ACTA2, GUCY1A3, GUCY1B3, GNAS	28	112	5085	8.10746	0.105353	0.105353	2.42331
	KEGG_PATHWAY	hsa04730:Long-term depression	3	3.2967	0.0512238	GUCY1A3, GUCY1B3, GNAS	28	69	5085	7.89596	0.89013	0.668534	38.5317
	KEGG_PATHWAY	hsa04540:Gap junction	3	3.2967	0.0801825	GUCY1A3, GUCY1B3, GNAS	28	89	5085	6.12159	0.970114	0.584216	53.8619
	Annotation Cluster 5	Enrichment Score: 1.4926392958233292
	Category	Term	Count	%	PValue	Genes	List Total	Pop Hits	Pop Total	Fold Enrichment	Bonferroni	Benjamini	FDR
blood circulation	KEGG_PATHWAY	hsa04270:Vascular smooth muscle contraction	5	5.49451	0.00264712	KCNMB4, ACTA2, GUCY1A3, GUCY1B3, GNAS	28	112	5085	8.10746	0.105353	0.105353	2.42331
	GOTERM_BP_FAT	GO:0003013~circulatory system process	4	4.3956	0.0669991	ACTA2, GUCY1A3, GUCY1B3, NPR3	69	186	13528	4.2163	1	0.79419	66.0153
	GOTERM_BP_FAT	GO:0008015~blood circulation	4	4.3956	0.0669991	ACTA2, GUCY1A3, GUCY1B3, NPR3	69	186	13528	4.2163	1	0.79419	66.0153
	GOTERM_BP_FAT	GO:0008217~regulation of blood pressure	3	3.2967	0.0900598	ACTA2, GUCY1A3, NPR3	69	100	13528	5.88174	1	0.776474	76.9787
	Annotation Cluster 6	Enrichment Score: 1.3829391218586926
	Category	Term	Count	%	PValue	Genes	List Total	Pop Hits	Pop Total	Fold Enrichment	Bonferroni	Benjamini	FDR
response to metal ion	GOTERM_BP_FAT	GO:0010038~response to metal ion	4	4.3956	0.0270873	KCNMB4, TRPC1, DUSP1, GATM	69	129	13528	6.07932	1	0.723317	34.7776
	GOTERM_BP_FAT	GO:0051592~response to calcium ion	3	3.2967	0.0311586	KCNMB4, TRPC1, DUSP1	69	55	13528	10.6941	1	0.705804	38.8981
	GOTERM_BP_FAT	GO:0010035~response to inorganic substance	4	4.3956	0.0841082	KCNMB4, TRPC1, DUSP1, GATM	69	205	13528	3.82552	1	0.770919	74.5204
	Annotation Cluster 7	Enrichment Score: 1.0327565726318202
	Category	Term	Count	%	PValue	Genes	List Total	Pop Hits	Pop Total	Fold Enrichment	Bonferroni	Benjamini	FDR
response to nutrient	GOTERM_BP_FAT	GO:0009991~response to extracellular stimulus	5	5.49451	0.0246747	DUSP1, GATM, SFRP2, IL6ST, VLDLR	69	220	13528	4.45586	1	0.708858	32.2145
	GOTERM_BP_FAT	GO:0007584~response to nutrient	4	4.3956	0.0333722	DUSP1, GATM, IL6ST, VLDLR	69	140	13528	5.60166	1	0.715568	41.035
	GOTERM_BP_FAT	GO:0010033~response to organic substance	8	8.79121	0.0693244	THBD, DUSP1, GATM, IL6ST, KLF10, GNAS, MYC, VLDLR	69	721	13528	2.1754	1	0.773576	67.3098
	GOTERM_BP_FAT	GO:0031667~response to nutrient levels	4	4.3956	0.0766911	DUSP1, GATM, IL6ST, VLDLR	69	197	13528	3.98087	1	0.771862	71.1127
	GOTERM_BP_FAT	GO:0032870~cellular response to hormone stimulus	3	3.2967	0.144083	DUSP1, GNAS, VLDLR	69	133	13528	4.42236	1	0.830217	91.1191
	GOTERM_BP_FAT	GO:0009725~response to hormone stimulus	4	4.3956	0.280672	DUSP1, GATM, GNAS, VLDLR	69	367	13528	2.13687	1	0.91289	99.4065
	GOTERM_BP_FAT	GO:0009719~response to endogenous stimulus	4	4.3956	0.333138	DUSP1, GATM, GNAS, VLDLR	69	405	13528	1.93638	1	0.940038	99.8174
	Annotation Cluster 8	Enrichment Score: 1.0298744148406773
	Category	Term	Count	%	PValue	Genes	List Total	Pop Hits	Pop Total	Fold Enrichment	Bonferroni	Benjamini	FDR
regulation of transcription	GOTERM_BP_FAT	GO:0010629~negative regulation of gene expression	8	8.79121	0.0130418	HHEX, CCDC85B, GLIS2, KLF10, ZHX2, ID4, WWTR1, MYC	69	504	13528	3.11203	0.999991	0.811226	18.4783
	GOTERM_BP_FAT	GO:0045596~negative regulation of cell differentiation	5	5.49451	0.0232584	NOTCH1, CCDC85B, ID4, TGFB1I1, WWTR1	69	216	13528	4.53838	1	0.729521	30.6663
	GOTERM_BP_FAT	GO:0016481~negative regulation of transcription	7	7.69231	0.0275221	HHEX, CCDC85B, GLIS2, KLF10, ZHX2, ID4, WWTR1	69	459	13528	2.98999	1	0.710763	35.2297
	GOTERM_BP_FAT	GO:0045935~positive regulation of nucleobase, nucleoside, nucleotide and nucleic acid metabolic process	8	8.79121	0.0366357	HHEX, NOTCH1, GLIS2, PAX8, GUCY1A3, TGFB1I1, WWTR1, MYC	69	624	13528	2.51356	1	0.734789	44.0581
	GOTERM_BP_FAT	GO:0051173~positive regulation of nitrogen compound metabolic process	8	8.79121	0.0422997	HHEX, NOTCH1, GLIS2, PAX8, GUCY1A3, TGFB1I1, WWTR1, MYC	69	644	13528	2.4355	1	0.771862	48.9633
	GOTERM_BP_FAT	GO:0045934~negative regulation of nucleobase, nucleoside, nucleotide and nucleic acid metabolic process	7	7.69231	0.0433528	HHEX, CCDC85B, GLIS2, KLF10, ZHX2, ID4, WWTR1	69	512	13528	2.68048	1	0.767601	49.8298
	GOTERM_BP_FAT	GO:0051172~negative regulation of nitrogen compound metabolic process	7	7.69231	0.0457993	HHEX, CCDC85B, GLIS2, KLF10, ZHX2, ID4, WWTR1	69	519	13528	2.64433	1	0.774285	51.7898
	GOTERM_BP_FAT	GO:0031328~positive regulation of cellular biosynthetic process	8	8.79121	0.0556373	HHEX, NOTCH1, GLIS2, PAX8, GUCY1A3, TGFB1I1, WWTR1, MYC	69	685	13528	2.28973	1	0.806337	58.9708
	GOTERM_BP_FAT	GO:0010558~negative regulation of macromolecule biosynthetic process	7	7.69231	0.0564449	HHEX, CCDC85B, GLIS2, KLF10, ZHX2, ID4, WWTR1	69	547	13528	2.50897	1	0.800931	59.5134
	GOTERM_BP_FAT	GO:0009891~positive regulation of biosynthetic process	8	8.79121	0.0592516	HHEX, NOTCH1, GLIS2, PAX8, GUCY1A3, TGFB1I1, WWTR1, MYC	69	695	13528	2.25678	1	0.807074	61.3476
	GOTERM_BP_FAT	GO:0031327~negative regulation of cellular biosynthetic process	7	7.69231	0.0622894	HHEX, CCDC85B, GLIS2, KLF10, ZHX2, ID4, WWTR1	69	561	13528	2.44636	1	0.795706	63.245
	GOTERM_BP_FAT	GO:0045941~positive regulation of transcription	7	7.69231	0.0635873	HHEX, NOTCH1, GLIS2, PAX8, TGFB1I1, WWTR1, MYC	69	564	13528	2.43334	1	0.793726	64.0288
	GOTERM_BP_FAT	GO:0009890~negative regulation of biosynthetic process	7	7.69231	0.0675778	HHEX, CCDC85B, GLIS2, KLF10, ZHX2, ID4, WWTR1	69	573	13528	2.39512	1	0.788826	66.3418
	GOTERM_BP_FAT	GO:0010628~positive regulation of gene expression	7	7.69231	0.0712467	HHEX, NOTCH1, GLIS2, PAX8, TGFB1I1, WWTR1, MYC	69	581	13528	2.36214	1	0.775383	68.3449
	GOTERM_BP_FAT	GO:0006357~regulation of transcription from RNA polymerase II promoter	8	8.79121	0.0717883	HHEX, NOTCH1, KLF10, PAX8, ZHX2, ID4, WWTR1, MYC	69	727	13528	2.15745	1	0.763003	68.631
	GOTERM_BP_FAT	GO:0010605~negative regulation of macromolecule metabolic process	8	8.79121	0.0747292	HHEX, CCDC85B, GLIS2, KLF10, ZHX2, ID4, WWTR1, MYC	69	734	13528	2.13687	1	0.769867	70.1426
	GOTERM_BP_FAT	GO:0045893~positive regulation of transcription, DNA-dependent	6	6.59341	0.0914419	HHEX, NOTCH1, PAX8, TGFB1I1, WWTR1, MYC	69	477	13528	2.46614	1	0.775897	77.5169
	GOTERM_BP_FAT	GO:0051254~positive regulation of RNA metabolic process	6	6.59341	0.0939406	HHEX, NOTCH1, PAX8, TGFB1I1, WWTR1, MYC	69	481	13528	2.44563	1	0.779548	78.4602
	GOTERM_BP_FAT	GO:0010557~positive regulation of macromolecule biosynthetic process	7	7.69231	0.109964	HHEX, NOTCH1, GLIS2, PAX8, TGFB1I1, WWTR1, MYC	69	654	13528	2.09848	1	0.806765	83.6828
	GOTERM_BP_FAT	GO:0045944~positive regulation of transcription from RNA polymerase II promoter	5	5.49451	0.116195	HHEX, NOTCH1, PAX8, WWTR1, MYC	69	371	13528	2.64229	1	0.801074	85.3727
	GOTERM_BP_FAT	GO:0010604~positive regulation of macromolecule metabolic process	8	8.79121	0.137889	HHEX, NOTCH1, IL6ST, GLIS2, PAX8, TGFB1I1, WWTR1, MYC	69	857	13528	1.83018	1	0.823697	90.0645
	GOTERM_BP_FAT	GO:0000122~negative regulation of transcription from RNA polymerase II promoter	4	4.3956	0.149541	HHEX, KLF10, ZHX2, WWTR1	69	266	13528	2.94824	1	0.8347	91.9607
	GOTERM_BP_FAT	GO:0045892~negative regulation of transcription, DNA-dependent	4	4.3956	0.265626	HHEX, KLF10, ZHX2, WWTR1	69	356	13528	2.2029	1	0.908065	99.1809
	GOTERM_BP_FAT	GO:0051253~negative regulation of RNA metabolic process	4	4.3956	0.27382	HHEX, KLF10, ZHX2, WWTR1	69	362	13528	2.16639	1	0.910232	99.3122
	GOTERM_BP_FAT	GO:0006355~regulation of transcription, DNA-dependent	10	10.989	0.541595	HHEX, NOTCH1, KLF10, PAX8, ZHX2, ID4, TGFB1I1, WWTR1, NFIL3, MYC	69	1773	13528	1.1058	1	0.99077	99.9995
	GOTERM_BP_FAT	GO:0051252~regulation of RNA metabolic process	10	10.989	0.570048	HHEX, NOTCH1, KLF10, PAX8, ZHX2, ID4, TGFB1I1, WWTR1, NFIL3, MYC	69	1813	13528	1.0814	1	0.991854	99.9998
	GOTERM_BP_FAT	GO:0006350~transcription	10	10.989	0.748884	HHEX, NOTCH1, GLIS2, KLF10, PAX8, ZHX2, TGFB1I1, WWTR1, NFIL3, MYC	69	2101	13528	0.933165	1	0.999442	100
	GOTERM_BP_FAT	GO:0045449~regulation of transcription	12	13.1868	0.782975	HHEX, NOTCH1, CCDC85B, GLIS2, KLF10, PAX8, ZHX2, ID4, TGFB1I1, WWTR1, NFIL3, MYC	69	2601	13528	0.904535	1	0.99972	100
	Annotation Cluster 9	Enrichment Score: 1.0291546208665674
	Category	Term	Count	%	PValue	Genes	List Total	Pop Hits	Pop Total	Fold Enrichment	Bonferroni	Benjamini	FDR
cell differentiation	GOTERM_BP_FAT	GO:0045597~positive regulation of cell differentiation	5	5.49451	0.0280498	NOTCH1, IL6ST, KLF10, GNAS, TGFB1I1	69	229	13528	4.28074	1	0.700132	35.7745
	GOTERM_BP_FAT	GO:0051094~positive regulation of developmental process	5	5.49451	0.051107	NOTCH1, IL6ST, KLF10, GNAS, TGFB1I1	69	278	13528	3.52622	1	0.788714	55.7983
	GOTERM_BP_FAT	GO:0007166~cell surface receptor linked signal transduction	13	14.2857	0.216222	NIN, IL6ST, KLF10, CNKSR3, JAG2, NPR3, HHEX, NOTCH1, NXN, SFRP2, TGM2, GNAS, TGFB1I1	69	1856	13528	1.37325	1	0.892778	97.7439
	GOTERM_BP_FAT	GO:0007167~enzyme linked receptor protein signaling pathway	4	4.3956	0.246645	NIN, IL6ST, KLF10, TGFB1I1	69	342	13528	2.29308	1	0.904925	98.7816
	Annotation Cluster 10	Enrichment Score: 1.0062029553776362
	Category	Term	Count	%	PValue	Genes	List Total	Pop Hits	Pop Total	Fold Enrichment	Bonferroni	Benjamini	FDR
cell growth	GOTERM_BP_FAT	GO:0008361~regulation of cell size	5	5.49451	0.0199399	DAB2, CCDC85B, CDKN2C, CSRP2, EMP1	69	206	13528	4.75869	1	0.863238	26.9082
	GOTERM_BP_FAT	GO:0032535~regulation of cellular component size	5	5.49451	0.0473245	DAB2, CCDC85B, CDKN2C, CSRP2, EMP1	69	271	13528	3.61731	1	0.773768	52.9752
	GOTERM_BP_FAT	GO:0030308~negative regulation of cell growth	3	3.2967	0.0781006	DAB2, CCDC85B, CDKN2C	69	92	13528	6.39319	1	0.757682	71.7914
	GOTERM_BP_FAT	GO:0045792~negative regulation of cell size	3	3.2967	0.0885363	DAB2, CCDC85B, CDKN2C	69	99	13528	5.94115	1	0.776518	76.3715
	GOTERM_BP_FAT	GO:0045926~negative regulation of growth	3	3.2967	0.105707	DAB2, CCDC85B, CDKN2C	69	110	13528	5.34704	1	0.814258	82.4249
	GOTERM_BP_FAT	GO:0001558~regulation of cell growth	3	3.2967	0.254995	DAB2, CCDC85B, CDKN2C	69	194	13528	3.03182	1	0.907357	98.9756
	GOTERM_BP_FAT	GO:0040008~regulation of growth	3	3.2967	0.514471	DAB2, CCDC85B, CDKN2C	69	341	13528	1.72485	1	0.989148	99.9987

## Sheet: C6
function clusters	Annotation Cluster 1	Enrichment Score: 1.984713861633603
	Category	Term	Count	%	PValue	Genes	List Total	Pop Hits	Pop Total	Fold Enrichment	Bonferroni	Benjamini	FDR
regulation of transcription	GOTERM_BP_FAT	GO:0006350~transcription	18	24.3243	0.00199997	IKZF1, KLF9, TBX2, ZBTB10, ASXL1, ZNF569, ZFP2, MEIS1, STAT3, ZNF829, ZNF677, STAT4, LBH, PRDM6, ZSCAN18, TCEA2, ZNF570, FIZ1	54	2101	13528	2.14628	0.705715	0.705715	2.92062
	GOTERM_BP_FAT	GO:0045449~regulation of transcription	20	27.027	0.00332594	IKZF1, KLF9, TBX2, ZBTB10, ASXL1, ZNF569, ZFP2, MEIS1, ZNF880, ZNF829, STAT3, ZNF677, STAT4, LBH, PRDM6, DMD, ZSCAN18, TCEA2, ZNF570, FIZ1	54	2601	13528	1.92632	0.86939	0.638599	4.8129
	GOTERM_BP_FAT	GO:0006355~regulation of transcription, DNA-dependent	13	17.5676	0.0386401	IKZF1, KLF9, TBX2, ZNF569, MEIS1, ZNF880, STAT3, ZNF829, ZNF677, STAT4, ZSCAN18, TCEA2, ZNF570	54	1773	13528	1.83685	1	0.997569	44.203
	GOTERM_BP_FAT	GO:0051252~regulation of RNA metabolic process	13	17.5676	0.0447887	IKZF1, KLF9, TBX2, ZNF569, MEIS1, ZNF880, STAT3, ZNF829, ZNF677, STAT4, ZSCAN18, TCEA2, ZNF570	54	1813	13528	1.79633	1	0.9963	49.2597

## Sheet: C7
function clusters	Annotation Cluster 1	Enrichment Score: 2.736200967916408
	Category	Term	Count	%	PValue	Genes	List Total	Pop Hits	Pop Total	Fold Enrichment	Bonferroni	Benjamini	FDR
phosphorylation	GOTERM_BP_FAT	GO:0006793~phosphorus metabolic process	22	12.3596	0.000569507	NDUFB4, ATP6V0E1, ALPK1, ADAM10, TNIK, EFNA1, PDK3, PTPRR, CHEK1, OXSR1, STAT1, ATP5G3, CDK2, MTMR11, DAPP1, MAPK6, BAZ1B, MTMR10, RIPK2, PAK1, RIPK4, PGK1	135	973	13528	2.26574	0.514939	0.514939	0.923175
	GOTERM_BP_FAT	GO:0006796~phosphate metabolic process	22	12.3596	0.000569507	NDUFB4, ATP6V0E1, ALPK1, ADAM10, TNIK, EFNA1, PDK3, PTPRR, CHEK1, OXSR1, STAT1, ATP5G3, CDK2, MTMR11, DAPP1, MAPK6, BAZ1B, MTMR10, RIPK2, PAK1, RIPK4, PGK1	135	973	13528	2.26574	0.514939	0.514939	0.923175
	GOTERM_BP_FAT	GO:0016310~phosphorylation	18	10.1124	0.00233514	NDUFB4, ATP6V0E1, ALPK1, ADAM10, TNIK, EFNA1, PDK3, CHEK1, OXSR1, STAT1, ATP5G3, CDK2, MAPK6, BAZ1B, RIPK2, PAK1, RIPK4, PGK1	135	800	13528	2.25467	0.948651	0.628312	3.7347
	GOTERM_BP_FAT	GO:0006468~protein amino acid phosphorylation	14	7.86517	0.0149929	ALPK1, TNIK, ADAM10, EFNA1, PDK3, CHEK1, OXSR1, STAT1, CDK2, BAZ1B, MAPK6, RIPK2, PAK1, RIPK4	135	667	13528	2.1033	1	0.797853	21.8033
	Annotation Cluster 2	Enrichment Score: 2.2165673439507363
	Category	Term	Count	%	PValue	Genes	List Total	Pop Hits	Pop Total	Fold Enrichment	Bonferroni	Benjamini	FDR
proteolysis	GOTERM_BP_FAT	GO:0009057~macromolecule catabolic process	18	10.1124	0.00181323	ADAM10, CBX4, UBA6, FKBP1A, OAS2, ABCG1, GTF2H1, FEM1C, RFWD2, SUMO1, OTUB1, ANAPC7, RNF149, YOD1, SPOPL, FBXO45, ASB7, FBXO7	135	781	13528	2.30952	0.90023	0.684137	2.91152
	GOTERM_BP_FAT	GO:0006508~proteolysis	21	11.7978	0.00360406	CTSL2, CFLAR, NPEPL1, ADAM10, CBX4, UBA6, TMPRSS3, FEM1C, RFWD2, SUMO1, OTUB1, NLN, KLK10, YOD1, ANAPC7, RNF149, PCSK6, SPOPL, ASB7, FBXO45, FBXO7	135	1054	13528	1.99654	0.989801	0.682207	5.70883
	GOTERM_BP_FAT	GO:0044265~cellular macromolecule catabolic process	16	8.98876	0.00540688	ADAM10, CBX4, UBA6, OAS2, GTF2H1, FEM1C, RFWD2, SUMO1, OTUB1, ANAPC7, RNF149, YOD1, SPOPL, FBXO45, ASB7, FBXO7	135	725	13528	2.21147	0.998977	0.747684	8.44834
	GOTERM_BP_FAT	GO:0051603~proteolysis involved in cellular protein catabolic process	14	7.86517	0.00654537	ADAM10, CBX4, UBA6, RFWD2, FEM1C, SUMO1, OTUB1, ANAPC7, RNF149, YOD1, SPOPL, FBXO45, ASB7, FBXO7	135	600	13528	2.33817	0.999761	0.750923	10.1397
	GOTERM_BP_FAT	GO:0044257~cellular protein catabolic process	14	7.86517	0.00681502	ADAM10, CBX4, UBA6, RFWD2, FEM1C, SUMO1, OTUB1, ANAPC7, RNF149, YOD1, SPOPL, FBXO45, ASB7, FBXO7	135	603	13528	2.32654	0.999831	0.71081	10.5359
	GOTERM_BP_FAT	GO:0030163~protein catabolic process	14	7.86517	0.00873522	ADAM10, CBX4, UBA6, RFWD2, FEM1C, SUMO1, OTUB1, ANAPC7, RNF149, YOD1, SPOPL, FBXO45, ASB7, FBXO7	135	622	13528	2.25547	0.999986	0.710051	13.3108
	GOTERM_BP_FAT	GO:0019941~modification-dependent protein catabolic process	13	7.30337	0.0115957	CBX4, UBA6, RFWD2, FEM1C, SUMO1, OTUB1, ANAPC7, RNF149, YOD1, SPOPL, FBXO45, ASB7, FBXO7	135	574	13528	2.26951	1	0.739877	17.295
	GOTERM_BP_FAT	GO:0043632~modification-dependent macromolecule catabolic process	13	7.30337	0.0115957	CBX4, UBA6, RFWD2, FEM1C, SUMO1, OTUB1, ANAPC7, RNF149, YOD1, SPOPL, FBXO45, ASB7, FBXO7	135	574	13528	2.26951	1	0.739877	17.295
	Annotation Cluster 3	Enrichment Score: 1.2649593071637433
	Category	Term	Count	%	PValue	Genes	List Total	Pop Hits	Pop Total	Fold Enrichment	Bonferroni	Benjamini	FDR
cell proliferation	GOTERM_BP_FAT	GO:0034097~response to cytokine stimulus	5	2.80899	0.00779855	ADAM10, MYD88, RIPK2, BCL2L1, STAT1	135	79	13528	6.34224	0.999952	0.711446	11.9675
	GOTERM_BP_FAT	GO:0042127~regulation of cell proliferation	13	7.30337	0.0902712	ADAM10, AIMP1, EGLN3, SMAD3, CHEK1, BCL2L1, STAT1, CDK2, LIF, HOXC10, MYD88, RIPK2, FGFBP1	135	787	13528	1.65527	1	0.991821	78.5683
	GOTERM_BP_FAT	GO:0008284~positive regulation of cell proliferation	7	3.93258	0.227803	LIF, HOXC10, ADAM10, RIPK2, BCL2L1, STAT1, CDK2	135	414	13528	1.69433	1	0.990188	98.5136
	Annotation Cluster 4	Enrichment Score: 1.0285634346489736
	Category	Term	Count	%	PValue	Genes	List Total	Pop Hits	Pop Total	Fold Enrichment	Bonferroni	Benjamini	FDR
regulation of binding	GOTERM_BP_FAT	GO:0051098~regulation of binding	6	3.37079	0.0180564	SUMO1, MYD88, NCOA3, SMAD3, RIPK2, FKBP1A	135	153	13528	3.9297	1	0.831377	25.6701
	GOTERM_BP_FAT	GO:0051099~positive regulation of binding	4	2.24719	0.0422355	MYD88, NCOA3, RIPK2, FKBP1A	135	78	13528	5.13884	1	0.960197	50.4688
	GOTERM_BP_FAT	GO:0043123~positive regulation of I-kappaB kinase/NF-kappaB cascade	4	2.24719	0.0716567	CFLAR, MYD88, RIPK2, FKBP1A	135	97	13528	4.13226	1	0.993057	70.1961
	GOTERM_BP_FAT	GO:0051090~regulation of transcription factor activity	4	2.24719	0.082437	SUMO1, MYD88, NCOA3, RIPK2	135	103	13528	3.89155	1	0.993033	75.3575
	GOTERM_BP_FAT	GO:0010740~positive regulation of protein kinase cascade	5	2.80899	0.0842771	LIF, CFLAR, MYD88, RIPK2, FKBP1A	135	167	13528	3.00022	1	0.992261	76.1498
	GOTERM_BP_FAT	GO:0043122~regulation of I-kappaB kinase/NF-kappaB cascade	4	2.24719	0.0899893	CFLAR, MYD88, RIPK2, FKBP1A	135	107	13528	3.74607	1	0.993194	78.4599
	GOTERM_BP_FAT	GO:0010627~regulation of protein kinase cascade	6	3.37079	0.101503	LIF, CFLAR, MYD88, RIPK2, FKBP1A, PAK1	135	249	13528	2.41464	1	0.994636	82.4929
	GOTERM_BP_FAT	GO:0051101~regulation of DNA binding	4	2.24719	0.118538	SUMO1, MYD88, NCOA3, RIPK2	135	121	13528	3.31264	1	0.996016	87.1803
	GOTERM_BP_FAT	GO:0051091~positive regulation of transcription factor activity	3	1.68539	0.119063	MYD88, NCOA3, RIPK2	135	60	13528	5.01037	1	0.99533	87.3041
	GOTERM_BP_FAT	GO:0006916~anti-apoptosis	5	2.80899	0.147999	CFLAR, MYD88, CBX4, RIPK2, BCL2L1	135	206	13528	2.43222	1	0.992118	92.6291
	GOTERM_BP_FAT	GO:0043388~positive regulation of DNA binding	3	1.68539	0.152685	MYD88, NCOA3, RIPK2	135	70	13528	4.2946	1	0.992504	93.2622
	GOTERM_BP_FAT	GO:0009967~positive regulation of signal transduction	6	3.37079	0.168959	LIF, CFLAR, MYD88, NCOA3, RIPK2, FKBP1A	135	295	13528	2.03812	1	0.991745	95.0865
	GOTERM_BP_FAT	GO:0010647~positive regulation of cell communication	6	3.37079	0.227582	LIF, CFLAR, MYD88, NCOA3, RIPK2, FKBP1A	135	329	13528	1.82749	1	0.990768	98.5067

## Sheet: C8
function clusters	Annotation Cluster 1	Enrichment Score: 2.393414380782616
	Category	Term	Count	%	PValue	Genes	List Total	Pop Hits	Pop Total	Fold Enrichment	Bonferroni	Benjamini	FDR
RNA splicing	GOTERM_BP_FAT	GO:0008380~RNA splicing	11	7.80142	2.97608e-05	CLNS1A, SNRNP48, PCBP2, TRA2A, RBM5, SNRNP35, ZNF638, RNPC3, PRPF18, RBM14, PRPF38B	96	284	13528	5.45804	0.0239927	0.0239927	0.045792
	GOTERM_BP_FAT	GO:0006397~mRNA processing	10	7.0922	0.000418084	CLNS1A, SNRNP48, PCBP2, TRA2A, RBM5, SNRNP35, RNPC3, PRPF18, RBM14, PRPF38B	96	321	13528	4.38993	0.289103	0.0659689	0.641498
	GOTERM_BP_FAT	GO:0016071~mRNA metabolic process	10	7.0922	0.0011509	CLNS1A, SNRNP48, PCBP2, TRA2A, RBM5, SNRNP35, RNPC3, PRPF18, RBM14, PRPF38B	96	370	13528	3.80856	0.609247	0.144965	1.75665
	GOTERM_BP_FAT	GO:0006396~RNA processing	12	8.51064	0.0015401	ATXN1, CLNS1A, SNRNP48, PCBP2, TRA2A, RBM5, SNRNP35, ZNF638, RNPC3, PRPF18, RBM14, PRPF38B	96	547	13528	3.09141	0.715689	0.145476	2.34412
	GOTERM_BP_FAT	GO:0000375~RNA splicing, via transesterification reactions	4	2.83688	0.0927972	CLNS1A, PCBP2, TRA2A, RBM5	96	153	13528	3.6841	1	0.941469	77.6606
	GOTERM_BP_FAT	GO:0000377~RNA splicing, via transesterification reactions with bulged adenosine as nucleophile	4	2.83688	0.0927972	CLNS1A, PCBP2, TRA2A, RBM5	96	153	13528	3.6841	1	0.941469	77.6606
	GOTERM_BP_FAT	GO:0000398~nuclear mRNA splicing, via spliceosome	4	2.83688	0.0927972	CLNS1A, PCBP2, TRA2A, RBM5	96	153	13528	3.6841	1	0.941469	77.6606
	Annotation Cluster 2	Enrichment Score: 2.1657234671172056
	Category	Term	Count	%	PValue	Genes	List Total	Pop Hits	Pop Total	Fold Enrichment	Bonferroni	Benjamini	FDR
protein localization and transport	GOTERM_BP_FAT	GO:0008104~protein localization	18	12.766	0.000122816	RAB2A, PDIA3, SNX4, AKAP10, VTI1A, MIA3, YWHAH, POM121, RAB18, VPS13C, ZFYVE16, SNAP23, RANBP2, SEC24C, TPR, TNPO1, SEC23IP, COG2	96	882	13528	2.87585	0.0953653	0.0488771	0.188847
	GOTERM_BP_FAT	GO:0015031~protein transport	16	11.3475	0.000258057	RAB2A, PDIA3, SNX4, VTI1A, MIA3, YWHAH, POM121, RAB18, ZFYVE16, SNAP23, RANBP2, TPR, SEC24C, TNPO1, SEC23IP, COG2	96	762	13528	2.95888	0.189903	0.0677932	0.396413
	GOTERM_BP_FAT	GO:0045184~establishment of protein localization	16	11.3475	0.000284706	RAB2A, PDIA3, SNX4, VTI1A, MIA3, YWHAH, POM121, RAB18, ZFYVE16, SNAP23, RANBP2, TPR, SEC24C, TNPO1, SEC23IP, COG2	96	769	13528	2.93195	0.207334	0.0564335	0.437266
	GOTERM_BP_FAT	GO:0006886~intracellular protein transport	10	7.0922	0.00124042	YWHAH, PDIA3, ZFYVE16, RANBP2, SEC24C, TPR, TNPO1, SEC23IP, VTI1A, COG2	96	374	13528	3.76783	0.636803	0.134707	1.89206
	GOTERM_BP_FAT	GO:0046907~intracellular transport	13	9.21986	0.00211591	RAB2A, PDIA3, VTI1A, ATXN1, YWHAH, ZFYVE16, SNAP23, RANBP2, TPR, SEC24C, SEC23IP, TNPO1, COG2	96	657	13528	2.78831	0.822434	0.174731	3.20727
	GOTERM_BP_FAT	GO:0034613~cellular protein localization	10	7.0922	0.00236615	YWHAH, PDIA3, ZFYVE16, RANBP2, SEC24C, TPR, TNPO1, SEC23IP, VTI1A, COG2	96	411	13528	3.42863	0.855296	0.175771	3.58016
	GOTERM_BP_FAT	GO:0070727~cellular macromolecule localization	10	7.0922	0.00248477	YWHAH, PDIA3, ZFYVE16, RANBP2, SEC24C, TPR, TNPO1, SEC23IP, VTI1A, COG2	96	414	13528	3.40378	0.868677	0.168525	3.75644
	GOTERM_BP_FAT	GO:0006606~protein import into nucleus	4	2.83688	0.0225762	PDIA3, RANBP2, TPR, TNPO1	96	86	13528	6.55426	1	0.761487	29.6318
	GOTERM_BP_FAT	GO:0051170~nuclear import	4	2.83688	0.0239676	PDIA3, RANBP2, TPR, TNPO1	96	88	13528	6.4053	1	0.756827	31.1578
	GOTERM_BP_FAT	GO:0006913~nucleocytoplasmic transport	5	3.5461	0.0241217	ATXN1, PDIA3, RANBP2, TPR, TNPO1	96	156	13528	4.51656	1	0.735074	31.3248
	GOTERM_BP_FAT	GO:0051169~nuclear transport	5	3.5461	0.0251304	ATXN1, PDIA3, RANBP2, TPR, TNPO1	96	158	13528	4.45939	1	0.726931	32.4092
	GOTERM_BP_FAT	GO:0034504~protein localization in nucleus	4	2.83688	0.0284152	PDIA3, RANBP2, TPR, TNPO1	96	94	13528	5.99645	1	0.749346	35.8305
	GOTERM_BP_FAT	GO:0016192~vesicle-mediated transport	9	6.38298	0.0493002	RAB2A, MIA3, RAB18, ZFYVE16, SNX4, SNAP23, SEC24C, VTI1A, COG2	96	576	13528	2.20182	1	0.885969	54.0708
	GOTERM_BP_FAT	GO:0017038~protein import	4	2.83688	0.0646469	PDIA3, RANBP2, TPR, TNPO1	96	131	13528	4.3028	1	0.916159	64.2467
	GOTERM_BP_FAT	GO:0006605~protein targeting	5	3.5461	0.0646998	PDIA3, ZFYVE16, RANBP2, TPR, TNPO1	96	215	13528	3.27713	1	0.906805	64.2779
	GOTERM_BP_FAT	GO:0033365~protein localization in organelle	4	2.83688	0.0833548	PDIA3, RANBP2, TPR, TNPO1	96	146	13528	3.86073	1	0.934882	73.8014
	Annotation Cluster 3	Enrichment Score: 1.0532549751578573
	Category	Term	Count	%	PValue	Genes	List Total	Pop Hits	Pop Total	Fold Enrichment	Bonferroni	Benjamini	FDR
proteolysis	GOTERM_BP_FAT	GO:0019941~modification-dependent protein catabolic process	9	6.38298	0.0484807	TBL1XR1, RNF19A, PPP2R5C, HERC4, USP46, FBXO32, UBE3C, RANBP2, HECTD1	96	574	13528	2.20949	1	0.894901	53.4578
	GOTERM_BP_FAT	GO:0043632~modification-dependent macromolecule catabolic process	9	6.38298	0.0484807	TBL1XR1, RNF19A, PPP2R5C, HERC4, USP46, FBXO32, UBE3C, RANBP2, HECTD1	96	574	13528	2.20949	1	0.894901	53.4578
	GOTERM_BP_FAT	GO:0051603~proteolysis involved in cellular protein catabolic process	9	6.38298	0.0598456	TBL1XR1, RNF19A, PPP2R5C, HERC4, USP46, FBXO32, UBE3C, RANBP2, HECTD1	96	600	13528	2.11375	1	0.919364	61.3156
	GOTERM_BP_FAT	GO:0044257~cellular protein catabolic process	9	6.38298	0.0612573	TBL1XR1, RNF19A, PPP2R5C, HERC4, USP46, FBXO32, UBE3C, RANBP2, HECTD1	96	603	13528	2.10323	1	0.914249	62.2
	GOTERM_BP_FAT	GO:0030163~protein catabolic process	9	6.38298	0.0706881	TBL1XR1, RNF19A, PPP2R5C, HERC4, USP46, FBXO32, UBE3C, RANBP2, HECTD1	96	622	13528	2.03899	1	0.908632	67.6401
	GOTERM_BP_FAT	GO:0009057~macromolecule catabolic process	10	7.0922	0.0972514	TBL1XR1, RNF19A, GUSB, PPP2R5C, HERC4, USP46, FBXO32, UBE3C, RANBP2, HECTD1	96	781	13528	1.80431	1	0.943799	79.2902
	GOTERM_BP_FAT	GO:0044265~cellular macromolecule catabolic process	9	6.38298	0.136576	TBL1XR1, RNF19A, PPP2R5C, HERC4, USP46, FBXO32, UBE3C, RANBP2, HECTD1	96	725	13528	1.74931	1	0.964156	89.565
	GOTERM_BP_FAT	GO:0006508~proteolysis	9	6.38298	0.463462	TBL1XR1, RNF19A, PPP2R5C, HERC4, USP46, FBXO32, UBE3C, RANBP2, HECTD1	96	1054	13528	1.20327	1	0.995505	99.9931
